# Supplementary material for: Phylogenetic Diversity of Lhr Proteins and Biochemical Activities of the Thermococcales aLhr2 DNA/RNA Helicase
Source: Preprints.org preprint supplement (doi:10.20944/preprints202103.0477.v1), 2021-03-18
Supplement: Supplementary file 2 [file tableS2A-sequence-identifiers-archaeal-LHR.xlsx]

## Sheet: archaeal LHR
Organism	Sequence identifier	Uniprot Ac	Locus-tag	Orthologous Group	Lineage
Pyrobaculum arsenaticum DSM 13514	ParsA01.ABP50415.1	A4WJ48	Pars_0829	aLHR1	cellular organisms; Archaea; TACK group; Crenarchaeota; Thermoprotei; Thermoproteales; Thermoproteaceae; Pyrobaculum; Pyrobaculum arsenaticum; Pyrobaculum arsenaticum DSM 13514;
Thermoproteus tenax Kra 1	ThteA01.LHR1	G4RPL1	TTX_0851	aLHR1	cellular organisms; Archaea; TACK group; Crenarchaeota; Thermoprotei; Thermoproteales; Thermoproteaceae; Thermoproteus; Thermoproteus tenax; Thermoproteus tenax Kra 1;
Vulcanisaeta distributa DSM 14429	VdisA01.ADN50045.1	E1QVB8	Vdis_0650	aLHR1	cellular organisms; Archaea; TACK group; Crenarchaeota; Thermoprotei; Thermoproteales; Thermoproteaceae; Vulcanisaeta; Vulcanisaeta distributa; Vulcanisaeta distributa DSM 14429;
Caldivirga maquilingensis IC-167	CmaqA01.ABW00949.1	A8M9R8	Cmaq_0095	aLHR1	cellular organisms; Archaea; TACK group; Crenarchaeota; Thermoprotei; Thermoproteales; Thermoproteaceae; Caldivirga; Caldivirga maquilingensis; Caldivirga maquilingensis IC-167;
Candidatus Nitrosocaldus cavascurensis SCU2	NcavA01.SPC34814.1	A0A2K5AT73	NCAV_1651	aLHR1	cellular organisms; Archaea; TACK group; Thaumarchaeota; Nitrososphaeria; Candidatus Nitrosocaldales; Candidatus Nitrosocaldaceae; Candidatus Nitrosocaldus; Candidatus Nitrosocaldus cavascurensis;
Candidatus Nitrososphaera gargensis Ga9.2	NgarA01.AFU59590.1	K0II36	Ngar_c26690	aLHR1	cellular organisms; Archaea; TACK group; Thaumarchaeota; Nitrososphaeria; Nitrososphaerales; Nitrososphaeraceae; Nitrososphaera; Candidatus Nitrososphaera gargensis; Candidatus Nitrososphaera gargensis Ga9.2;
Candidatus Nitrocosmicus oleophilus MY3	NoleA01.RHLE	A0A0N9YYG5	NMY3_01924	aLHR1	cellular organisms; Archaea; TACK group; Thaumarchaeota; Nitrososphaeria; Nitrososphaerales; Nitrososphaeraceae; Candidatus Nitrosocosmicus; Candidatus Nitrosocosmicus oleophilus;
Candidatus Nitrosopumilus koreensis AR1	NikoA01.AFS79963.1	K0B1T7	NKOR_00185	aLHR1	cellular organisms; Archaea; TACK group; Thaumarchaeota; Nitrosopumilales; Nitrosopumilaceae; Nitrosopumilus; Candidatus Nitrosopumilus koreensis; Candidatus Nitrosopumilus koreensis AR1;
Cenarchaeum symbiosum A	CsymA01.ABK78561.1	A0RYZ4	CENSYa_1953	aLHR1	cellular organisms; Archaea; TACK group; Thaumarchaeota; Cenarchaeales; Cenarchaeaceae; Cenarchaeum; Cenarchaeum symbiosum; Cenarchaeum symbiosum A;
Candidatus Nitrosopelagicus brevis CN25	NbreA01.AJA92230.1	A0A0A7V6B9	T478_0101	aLHR1	cellular organisms; Archaea; TACK group; Thaumarchaeota; Thaumarchaeota incertae sedis; Candidatus Nitrosopelagicus; Candidatus Nitrosopelagicus brevis;
Candidatus Nitrosotalea devanaterra	NdevA01.CUR50884.1	A0A128A0K6	NDEV_0119	aLHR1	cellular organisms; Archaea; TACK group; Thaumarchaeota; Thaumarchaeota incertae sedis; Candidatus Nitrosotalea; Candidatus Nitrosotalea devanaterra;
Pyrolobus fumarii 1A	PfumA01.AEM39494.1	G0ECC4	Pyrfu_1637	aLHR1	cellular organisms; Archaea; TACK group; Crenarchaeota; Thermoprotei; Desulfurococcales; Pyrodictiaceae; Pyrolobus; Pyrolobus fumarii; Pyrolobus fumarii 1A;
Ignicoccus hospitalis KIN4/I	IhosA01.ABU82523.1	A8AC71	Igni_1347	aLHR1	cellular organisms; Archaea; TACK group; Crenarchaeota; Thermoprotei; Desulfurococcales; Desulfurococcaceae; Ignicoccus; Ignicoccus hospitalis; Ignicoccus hospitalis KIN4/I;
Ignicoccus islandicus DSM 13165	IislA01.ALU12148.1	A0A0U2U7R1	EYM_00855	aLHR1	cellular organisms; Archaea; TACK group; Crenarchaeota; Thermoprotei; Desulfurococcales; Desulfurococcaceae; Ignicoccus; Ignicoccus islandicus; Ignicoccus islandicus DSM 13165;
Aeropyrum camini SY1	AcamA01.BAN90844.1	U3THM3	ACAM_1375	aLHR1	cellular organisms; Archaea; TACK group; Crenarchaeota; Thermoprotei; Desulfurococcales; Desulfurococcaceae; Aeropyrum; Aeropyrum camini; Aeropyrum camini SY1 = JCM 12091;
Caldisphaera lagunensis DSM 15908	ClagA01.AFZ70942.1	L0ACR9	Calag_1225	aLHR1	cellular organisms; Archaea; TACK group; Crenarchaeota; Thermoprotei; Acidilobales; Caldisphaeraceae; Caldisphaera; Caldisphaera lagunensis; Caldisphaera lagunensis DSM 15908;
Acidilobus sp. 7A	AclsA01.AMD31258.1	A0A109V638	SE86_03060	aLHR1	cellular organisms; Archaea; TACK group; Crenarchaeota; Thermoprotei; Acidilobales; Acidilobaceae; Acidilobus; unclassified Acidilobus; Acidilobus sp. 7A;
Hyperthermus butylicus DSM 5456	HbutA01.ABM81120.1	A2BMA9	Hbut_1290	aLHR1	cellular organisms; Archaea; TACK group; Crenarchaeota; Thermoprotei; Desulfurococcales; Pyrodictiaceae; Hyperthermus; Hyperthermus butylicus; Hyperthermus butylicus DSM 5456;
Pyrodictium delaneyi Su06	PdelA01.ALL01082.1	A0A0P0N364	Pyrde_1034	aLHR1	cellular organisms; Archaea; TACK group; Crenarchaeota; Thermoprotei; Desulfurococcales; Pyrodictiaceae; Pyrodictium; Pyrodictium delaneyi;
Fervidicoccus fontis Kam940	FfonA01.AFH42517.1	I0A0L0	FFONT_0527	aLHR1	cellular organisms; Archaea; TACK group; Crenarchaeota; Thermoprotei; Fervidicoccales; Fervidicoccaceae; Fervidicoccus; Fervidicoccus fontis; Fervidicoccus fontis Kam940;
Thermofilum uzonense 1807-2	ThuzA01.AKG38706.1	A0A0F7CL32	MA03_04640	aLHR1	cellular organisms; Archaea; TACK group; Crenarchaeota; Thermoprotei; Thermoproteales; Thermofilaceae; Thermofilum; Thermofilum uzonense;
Thermofilum adornatus 1910b	TfspA01.AGT35622.1	S6A5T2	N186_06420	aLHR1	cellular organisms; Archaea; TACK group; Crenarchaeota; Thermoprotei; Thermoproteales; Thermofilaceae; Thermofilum; Thermofilum adornatum;
Thermofilum pendens Hrk 5	TpenA01.ABL78414.1	A1RYY4	Tpen_1014	aLHR1	cellular organisms; Archaea; TACK group; Crenarchaeota; Thermoprotei; Thermoproteales; Thermofilaceae; Thermofilum; Thermofilum pendens; Thermofilum pendens Hrk 5;
Thermogladius calderae 1633	TcelA01.AFK50741.1	I3TDA3	TCELL_0316	aLHR1	cellular organisms; Archaea; TACK group; Crenarchaeota; Thermoprotei; Desulfurococcales; Desulfurococcaceae; Thermogladius; Thermogladius calderae; Thermogladius calderae 1633;
Desulfurococcus mucosus DSM 2162	DmucA01.ADV65481.1	E8RAP5	Desmu_1184	aLHR1	cellular organisms; Archaea; TACK group; Crenarchaeota; Thermoprotei; Desulfurococcales; Desulfurococcaceae; Desulfurococcus; Desulfurococcus mucosus; Desulfurococcus mucosus DSM 2162;
Desulfurococcus fermentans DSM 16532	DefeA01.AFL67159.1	I3XT85	Desfe_1291	aLHR1	cellular organisms; Archaea; TACK group; Crenarchaeota; Thermoprotei; Desulfurococcales; Desulfurococcaceae; Desulfurococcus; Desulfurococcus amylolyticus; Desulfurococcus amylolyticus DSM 16532;
Staphylothermus hellenicus DSM 12710	SellA01.ADI32543.1	D7D9U7	Shell_1455	aLHR1	cellular organisms; Archaea; TACK group; Crenarchaeota; Thermoprotei; Desulfurococcales; Desulfurococcaceae; Staphylothermus; Staphylothermus hellenicus; Staphylothermus hellenicus DSM 12710;
Thermosphaera aggregans DSM 11486	TaggA01.ADG91111.1	D5U1W1	Tagg_0838	aLHR1	cellular organisms; Archaea; TACK group; Crenarchaeota; Thermoprotei; Desulfurococcales; Desulfurococcaceae; Thermosphaera; Thermosphaera aggregans; Thermosphaera aggregans DSM 11486;
Ignisphaera aggregans DSM 17230	IaggA01.ADM26985.1	E0SPW3	Igag_0134	aLHR1	cellular organisms; Archaea; TACK group; Crenarchaeota; Thermoprotei; Desulfurococcales; Desulfurococcaceae; Ignisphaera; Ignisphaera aggregans; Ignisphaera aggregans DSM 17230;
Acidianus brierleyi DSM 1651	AbriA01.AWR94516.1	A0A2U9IEX3	DFR85_07840	aLHR1	cellular organisms; Archaea; TACK group; Crenarchaeota; Thermoprotei; Sulfolobales; Sulfolobaceae; Acidianus; Acidianus brierleyi;
Acidianus hospitalis W1	AhosA01.AEE93619.1	F4B7L4	Ahos_0732	aLHR1	cellular organisms; Archaea; TACK group; Crenarchaeota; Thermoprotei; Sulfolobales; Sulfolobaceae; Acidianus; Acidianus hospitalis; Acidianus hospitalis W1;
Acidianus sulfidivorans JP7	AcsuA01.AWR97187.1	A0A2U9IME3	DFR86_06160	aLHR1	cellular organisms; Archaea; TACK group; Crenarchaeota; Thermoprotei; Sulfolobales; Sulfolobaceae; Acidianus; Acidianus sulfidivorans; Acidianus sulfidivorans JP7;
Metallosphaera cuprina Ar-4	McupA01.AEB94164.1	F4FXW6	Mcup_0054	aLHR1	cellular organisms; Archaea; TACK group; Crenarchaeota; Thermoprotei; Sulfolobales; Sulfolobaceae; Metallosphaera; Metallosphaera cuprina; Metallosphaera cuprina Ar-4;
Metallosphaera hakonensis HO1-1	MhakA01.AWR99515.1	A0A2U9IU56	DFR87_07250	aLHR1	cellular organisms; Archaea; TACK group; Crenarchaeota; Thermoprotei; Sulfolobales; Sulfolobaceae; Metallosphaera; Metallosphaera hakonensis;
Sulfolobus sp. A20	SlspA01.AOL16000.1	A0A1C8ZRE0	BFU36_03835	aLHR1	cellular organisms; Archaea; TACK group; Crenarchaeota; Thermoprotei; Sulfolobales; Sulfolobaceae; Sulfolobus; unclassified Sulfolobus; Sulfolobus sp. A20;
Sulfolobus islandicus L.S.2.15	SislA01.ACP35833.1	C3MR20	LS215_1837	aLHR1	cellular organisms; Archaea; TACK group; Crenarchaeota; Thermoprotei; Sulfolobales; Sulfolobaceae; Sulfolobus; Sulfolobus islandicus; Sulfolobus islandicus L.S.2.15;
Sulfolobus acidocaldarius DSM 639	SaciA01.AAY80181.1	Q4JAJ8	Saci_0814	aLHR1	cellular organisms; Archaea; TACK group; Crenarchaeota; Thermoprotei; Sulfolobales; Sulfolobaceae; Sulfolobus; Sulfolobus acidocaldarius; Sulfolobus acidocaldarius DSM 639;
Sulfolobus tokodaii 7	StokA01.BAB65382.1	Q975L8	STK_04010	aLHR1	cellular organisms; Archaea; TACK group; Crenarchaeota; Thermoprotei; Sulfolobales; Sulfolobaceae; Sulfurisphaera; Sulfurisphaera tokodaii; Sulfurisphaera tokodaii str. 7;
Methanopyrus kandleri AV19	MkanA01.LHR	Q8TGY8	MK1035	aLHR1	cellular organisms; Archaea; Euryarchaeota; Methanopyri; Methanopyrales; Methanopyraceae; Methanopyrus; Methanopyrus kandleri; Methanopyrus kandleri AV19;
Candidatus Mancarchaeum acidiphilum Mia14	MarcA01.ASI13350.1	A0A218NLI8	Mia14_0001	aLHR1	cellular organisms; Archaea; DPANN group; Candidatus Micrarchaeota; Candidatus Mancarchaeum; Candidatus Mancarchaeum acidiphilum;
Odinarchaeota archaeon (strain LCB_4)	QodiA01.ODINLCB4_226	A0A1Q9N5R9		aLHR1	cellular organisms; Archaea; Asgard group; Candidatus Odinarchaeota; Candidatus Odinarchaeota archaeon LCB_4;
Heimdallarchaeota archaeon (strain B3-JM-08)	QheiE01.CEE45_882	A0A2U3CE33		aLHR1	cellular organisms; Archaea; Asgard group; Candidatus Heimdallarchaeota; Candidatus Heimdallarchaeota archaeon B3_Heim;
Candidatus Heimdallarchaeota archaeon	QheiG01.DRO63_776	A0A497QWZ8		aLHR1	cellular organisms; Archaea; Asgard group; Candidatus Heimdallarchaeota; Candidatus Heimdallarchaeota archaeon;
Candidatus Heimdallarchaeota archaeon	QheiH01.DRP02_985	A0A497R8M7		aLHR1	cellular organisms; Archaea; Asgard group; Candidatus Heimdallarchaeota; Candidatus Heimdallarchaeota archaeon;
Thorarchaeota archaeon (strain OWC)	QthoY01.EU527_347	A0A524G8A3		aLHR1	cellular organisms; Archaea; Asgard group; Candidatus Thorarchaeota; Candidatus Thorarchaeota archaeon;
Thorarchaeota archaeon (strain OWC)	QthoZ01.EU528_1963	A0A524G1B7		aLHR1	cellular organisms; Archaea; Asgard group; Candidatus Thorarchaeota; Candidatus Thorarchaeota archaeon;
Thorarchaeota archaeon (strain OWC)	QthoW01.E4H14_1412	A0A524M315		aLHR1	cellular organisms; Archaea; Asgard group; Candidatus Thorarchaeota; Candidatus Thorarchaeota archaeon;
Thorarchaeota archaeon (strain OWC)	QthoG01.C4K48_601	A0A3L6JNI6		aLHR1	cellular organisms; Archaea; Asgard group; Candidatus Thorarchaeota; Candidatus Thorarchaeota archaeon;
Thorarchaeota archaeon (strain OWC)	QthoP01.E3J86_2615	A0A523RXT9		aLHR1	cellular organisms; Archaea; Asgard group; Candidatus Thorarchaeota; Candidatus Thorarchaeota archaeon;
Candidatus Thorarchaeota archaeon SMTZ1-45	QthoB01.AM325_1118	A0A135VPZ9		aLHR1	cellular organisms; Archaea; Asgard group; Candidatus Thorarchaeota; Candidatus Thorarchaeota archaeon SMTZ1-45;
Thorarchaeota archaeon (strain AB_25)	QthoD01.THORAB25_620	A0A1Q9NQS5		aLHR1	cellular organisms; Archaea; Asgard group; Candidatus Thorarchaeota; Candidatus Thorarchaeota archaeon AB_25;
Thorarchaeota archaeon (strain OWC)	QthrA01.BAJATHORV1_2200	A0A5C9E3H6		aLHR1	cellular organisms; Archaea; Asgard group; Candidatus Thorarchaeota; Candidatus Thorarchaeota archaeon;
Thorarchaeota archaeon (strain OWC)	QthoS01.EU537_1348	A0A524EKK2		aLHR1	cellular organisms; Archaea; Asgard group; Candidatus Thorarchaeota; Candidatus Thorarchaeota archaeon;
Thorarchaeota archaeon (strain OWC)	QthoR01.EU546_69	A0A524CYX5		aLHR1	cellular organisms; Archaea; Asgard group; Candidatus Thorarchaeota; Candidatus Thorarchaeota archaeon;
Thorarchaeota archaeon (strain OWC)	QthoJ01.DRO87_456	A0A497QAV3		aLHR1	cellular organisms; Archaea; Asgard group; Candidatus Thorarchaeota; Candidatus Thorarchaeota archaeon;
Thorarchaeota archaeon (strain OWC)	QthoK01.DRO87_462	A0A497QAV3		aLHR1	cellular organisms; Archaea; Asgard group; Candidatus Thorarchaeota; Candidatus Thorarchaeota archaeon;
Thorarchaeota archaeon (strain OWC)	QthoF01.C4K49_2207	A0A3L6JH59		aLHR1	cellular organisms; Archaea; Asgard group; Candidatus Thorarchaeota; Candidatus Thorarchaeota archaeon;
Thorarchaeota archaeon (strain OWC)	QthoE01.C4K47_782	A0A3L6JIE2		aLHR1	cellular organisms; Archaea; Asgard group; Candidatus Thorarchaeota; Candidatus Thorarchaeota archaeon;
Thorarchaeota archaeon (strain OWC)	QthoV01.EU538_1649	A0A524ECS6		aLHR1	cellular organisms; Archaea; Asgard group; Candidatus Thorarchaeota; Candidatus Thorarchaeota archaeon;
Thorarchaeota archaeon (strain OWC)	QthoQ01.EU519_221	A0A524CCS3		aLHR1	cellular organisms; Archaea; Asgard group; Candidatus Thorarchaeota; Candidatus Thorarchaeota archaeon;
Candidatus Thorarchaeota archaeon SMTZ1-83	QthoA01.AM324_1185	A0A135VXJ9		aLHR1	cellular organisms; Archaea; Asgard group; Candidatus Thorarchaeota; Candidatus Thorarchaeota archaeon SMTZ1-83;
Thorarchaeota archaeon (strain OWC)	QthoI01.DRO93_615	A0A497QCQ5		aLHR1	cellular organisms; Archaea; Asgard group; Candidatus Thorarchaeota; Candidatus Thorarchaeota archaeon;
Candidatus Caldiarchaeum subterraneum	CasuA01.BAJ51257.1	E6N884	CSUB_C1406	aLHR1	cellular organisms; Archaea; TACK group; Thaumarchaeota; Thaumarchaeota incertae sedis; Candidatus Caldiarchaeum; Candidatus Caldiarchaeum subterraneum;
Candidatus Korarchaeum cryptofilum OPF8	CkorA01.ACB08054.1	B1L6H5	Kcr_1308	aLHR1	cellular organisms; Archaea; TACK group; Candidatus Korarchaeota; Candidatus Korarchaeum; Candidatus Korarchaeum cryptofilum; Candidatus Korarchaeum cryptofilum OPF8;
Pyrobaculum oguniense TE7	PoguA01.AFA38676.1	H6Q819	Pogu_0649	aLHR1	cellular organisms; Archaea; TACK group; Crenarchaeota; Thermoprotei; Thermoproteales; Thermoproteaceae; Pyrobaculum; Pyrobaculum oguniense; Pyrobaculum oguniense TE7;
Vulcanisaeta moutnovskia 768-28	VmouA01.ADY01975.1	F0QUZ3	VMUT_1774	aLHR1	cellular organisms; Archaea; TACK group; Crenarchaeota; Thermoprotei; Thermoproteales; Thermoproteaceae; Vulcanisaeta; Vulcanisaeta moutnovskia; Vulcanisaeta moutnovskia 768-28;
Caldivirga maquilingensis IC-167	CmaqA01.ABW02696.1	A8MBG3	Cmaq_1879	aLHR1	cellular organisms; Archaea; TACK group; Crenarchaeota; Thermoprotei; Thermoproteales; Thermoproteaceae; Caldivirga; Caldivirga maquilingensis; Caldivirga maquilingensis IC-167;
Archaeoglobus profundus DSM 5631	AproA01.ADB57209.1	D2RFY4	Arcpr_0137	aLHR1	cellular organisms; Archaea; Euryarchaeota; Archaeoglobi; Archaeoglobales; Archaeoglobaceae; Archaeoglobus; Archaeoglobus profundus; Archaeoglobus profundus DSM 5631;
Archaeoglobus veneficus SNP6	AvenA01.AEA46643.1	F2KQT1	Arcve_0622	aLHR1	cellular organisms; Archaea; Euryarchaeota; Archaeoglobi; Archaeoglobales; Archaeoglobaceae; Archaeoglobus; Archaeoglobus veneficus; Archaeoglobus veneficus SNP6;
Archaeoglobus fulgidus DSM 4304	AfulA01.AAB90094.1	O29116	AF_1149	aLHR1	cellular organisms; Archaea; Euryarchaeota; Archaeoglobi; Archaeoglobales; Archaeoglobaceae; Archaeoglobus; Archaeoglobus fulgidus; Archaeoglobus fulgidus DSM 4304;
Archaeoglobus sulfaticallidus PM70-1	AsulA01.AGK61210.1	N0BLT6	Asulf_01212	aLHR1	cellular organisms; Archaea; Euryarchaeota; Archaeoglobi; Archaeoglobales; Archaeoglobaceae; Archaeoglobus; Archaeoglobus sulfaticallidus; Archaeoglobus sulfaticallidus PM70-1;
Geoglobus acetivorans SBH6	GaceA01.AIY90306.1	A0A0A7GHD6	GACE_1265	aLHR1	cellular organisms; Archaea; Euryarchaeota; Archaeoglobi; Archaeoglobales; Archaeoglobaceae; Geoglobus; Geoglobus acetivorans;
Ferroglobus placidus DSM 10642	FplaA01.ADC65132.1	D3RXB9	Ferp_0968	aLHR1	cellular organisms; Archaea; Euryarchaeota; Archaeoglobi; Archaeoglobales; Archaeoglobaceae; Ferroglobus; Ferroglobus placidus; Ferroglobus placidus DSM 10642;
Pyrococcus kukulkanii NCB100	PkukA01.AMM55035.1	A0A127BCV1	TQ32_10270	aLHR1	cellular organisms; Archaea; Euryarchaeota; Thermococci; Thermococcales; Thermococcaceae; Pyrococcus; Pyrococcus kukulkanii;
Pyrococcus horikoshii OT3	PhorA01.PH1329	O59056		aLHR1	cellular organisms; Archaea; Euryarchaeota; Thermococci; Thermococcales; Thermococcaceae; Pyrococcus; Pyrococcus horikoshii; Pyrococcus horikoshii OT3;
Pyrococcus furiosus DSM 3638	PfurA01.AAL81628.1	Q8U0T0	PF1504	aLHR1	cellular organisms; Archaea; Euryarchaeota; Thermococci; Thermococcales; Thermococcaceae; Pyrococcus; Pyrococcus furiosus; Pyrococcus furiosus DSM 3638;
Pyrococcus yayanosii CH1	PyayA01.AEH24741.1	F8AEQ9	PYCH_10600	aLHR1	cellular organisms; Archaea; Euryarchaeota; Thermococci; Thermococcales; Thermococcaceae; Pyrococcus; Pyrococcus yayanosii; Pyrococcus yayanosii CH1;
Thermococcus profundus DT 5432	TproA01.ASJ02541.1	A0A2Z2MJD4	A3L09_04360	aLHR1	cellular organisms; Archaea; Euryarchaeota; Thermococci; Thermococcales; Thermococcaceae; Thermococcus; Thermococcus profundus;
Thermococcus barophilus MP	TbarA01.ADT83607.1	F0LKE9	TERMP_00630	aLHR1	cellular organisms; Archaea; Euryarchaeota; Thermococci; Thermococcales; Thermococcaceae; Thermococcus; Thermococcus barophilus; Thermococcus barophilus MP;
Aciduliprofundum boonei T469	AbooA01.ADD09031.1	B5ICF6	Aboo_1223	aLHR1	cellular organisms; Archaea; Euryarchaeota; Diaforarchaea group; DHVE2 group; Aciduliprofundum; Aciduliprofundum boonei; Aciduliprofundum boonei T469;
Cuniculiplasma divulgatum S5(T) (=JCM 30642; =VKM B-2941)	CdivA01.SIM64136.1	A0A1N5UUD9	CSP5_1112	aLHR1	cellular organisms; Archaea; Euryarchaeota; Diaforarchaea group; Thermoplasmata; Thermoplasmatales; Cuniculiplasmataceae; Cuniculiplasma; Cuniculiplasma divulgatum;
Thermoplasma acidophilum DSM1728	TaciA01.TA0838	Q9HJX4		aLHR1	cellular organisms; Archaea; Euryarchaeota; Diaforarchaea group; Thermoplasmata; Thermoplasmatales; Thermoplasmataceae; Thermoplasma; Thermoplasma acidophilum; Thermoplasma acidophilum DSM 1728;
uncultured archaeon	QaasA01.AKA49470.1	A0A0D5ZIH8	IX51_10590	aLHR1	cellular organisms; Archaea; environmental samples; uncultured archaeon;
Ferroplasma acidarmanus fer1	FaciA01.AGO61279.1	S0ATC3	FACI_IFERC00001G1299	aLHR1	cellular organisms; Archaea; Euryarchaeota; Diaforarchaea group; Thermoplasmata; Thermoplasmatales; Ferroplasmaceae; Ferroplasma; Ferroplasma acidarmanus; Ferroplasma acidarmanus fer1;
Picrophilus torridus DSM 9790	PtorA01.AAT43779.1	Q6KZS3	PTO1194	aLHR1	cellular organisms; Archaea; Euryarchaeota; Diaforarchaea group; Thermoplasmata; Thermoplasmatales; Picrophilaceae; Picrophilus; Picrophilus torridus; Picrophilus torridus DSM 9790;
Methanocorpusculum labreanum Z	MlabA01.ABN06685.1	A2SQS9	Mlab_0511	aLHR1	cellular organisms; Archaea; Euryarchaeota; Stenosarchaea group; Methanomicrobia; Methanomicrobiales; Methanocorpusculaceae; Methanocorpusculum; Methanocorpusculum labreanum; Methanocorpusculum labreanum Z;
Methanocella paludicola SANAE	MepaA01.BAI60201.1	D1YUS9	MCP_0129	aLHR1	cellular organisms; Archaea; Euryarchaeota; Stenosarchaea group; Methanomicrobia; Methanocellales; Methanocellaceae; Methanocella; Methanocella paludicola; Methanocella paludicola SANAE;
Methanolacinia petrolearia DSM 11571	MppeA01.ADN35742.1	E1RK19	Mpet_0975	aLHR1	cellular organisms; Archaea; Euryarchaeota; Stenosarchaea group; Methanomicrobia; Methanomicrobiales; Methanomicrobiaceae; Methanolacinia; Methanolacinia petrolearia; Methanolacinia petrolearia DSM 11571;
Methanospirillum hungatei JF-1	MhunA01.ABD40352.1	Q2FLP7	Mhun_0594	aLHR1	cellular organisms; Archaea; Euryarchaeota; Stenosarchaea group; Methanomicrobia; Methanomicrobiales; Methanospirillaceae; Methanospirillum; Methanospirillum hungatei; Methanospirillum hungatei JF-1;
Methanosphaerula palustris E1-9c	MpalA01.ACL17398.1	B8GDP7	Mpal_2100	aLHR1	cellular organisms; Archaea; Euryarchaeota; Stenosarchaea group; Methanomicrobia; Methanomicrobiales; Methanoregulaceae; Methanosphaerula; Methanosphaerula palustris; Methanosphaerula palustris E1-9c;
Methanoculleus bourgensis MS2T	MbouA01.LHR	I7J853	BN140_0980	aLHR1	cellular organisms; Archaea; Euryarchaeota; Stenosarchaea group; Methanomicrobia; Methanomicrobiales; Methanomicrobiaceae; Methanoculleus; Methanoculleus bourgensis; Methanoculleus bourgensis MS2;
Methanosaeta harundinacea 6Ac	MharA01.AET63739.1	G7WM74	Mhar_0352	aLHR1	cellular organisms; Archaea; Euryarchaeota; Stenosarchaea group; Methanomicrobia; Methanosarcinales; Methanotrichaceae; Methanothrix; Methanosaeta harundinacea; Methanosaeta harundinacea 6Ac;
Methanosaeta concilii GP6	MscoA01.AEB68802.1	F4BY50	MCON_2326	aLHR1	cellular organisms; Archaea; Euryarchaeota; Stenosarchaea group; Methanomicrobia; Methanosarcinales; Methanotrichaceae; Methanothrix; Methanothrix soehngenii; Methanothrix soehngenii GP6;
Methanosaeta thermophila PT	MethA01.ABK14569.1	A0B795	Mthe_0779	aLHR1	cellular organisms; Archaea; Euryarchaeota; Stenosarchaea group; Methanomicrobia; Methanosarcinales; Methanotrichaceae; Methanothrix; Methanothrix thermoacetophila; Methanothrix thermoacetophila PT;
Candidatus Methanomassiliicoccus intestinalis Issoire-Mx1	MeinA01.AGN25442.1	R9T3K1	MMINT_00260	aLHR1	cellular organisms; Archaea; Euryarchaeota; Diaforarchaea group; Thermoplasmata; Methanomassiliicoccales; Methanomassiliicoccaceae; Methanomassiliicoccus; Candidatus Methanomassiliicoccus intestinalis; Candidatus Methanomassiliicoccus intestinalis Issoire-Mx1;
Candidatus Methanoplasma termitum MpT1	MterA01.AIZ57269.1	A0A0A7LDW8	Mpt1_c14110	aLHR1	cellular organisms; Archaea; Euryarchaeota; Diaforarchaea group; Thermoplasmata; Methanomassiliicoccales; Methanomassiliicoccaceae; Candidatus Methanoplasma; Candidatus Methanoplasma termitum;
Thermoplasmatales archaeon BRNA1	TarcA01.AGI48506.1	M4YUS5	TALC_01538	aLHR1	cellular organisms; Archaea; Euryarchaeota; Diaforarchaea group; Thermoplasmata; Thermoplasmatales; unclassified Thermoplasmatales; Thermoplasmatales archaeon BRNA1;
Halohasta litchfieldiae tADL	HlitA01.ATW89303.1	A0A2H4Q4K9	halTADL_2571	aLHR1	cellular organisms; Archaea; Euryarchaeota; Stenosarchaea group; Halobacteria; Haloferacales; Halorubraceae; Halohasta; Halohasta litchfieldiae;
Natronomonas moolapensis 8.8.11	NmooA01.LHR1	M1XPK1	Nmlp_1787	aLHR1	cellular organisms; Archaea; Euryarchaeota; Stenosarchaea group; Halobacteria; Halobacteriales; Haloarculaceae; Natronomonas; Natronomonas moolapensis; Natronomonas moolapensis 8.8.11;
Natrinema sp. J7-2	NaspA01.AFO57350.1	I7BWN7	NJ7G_2109	aLHR1	cellular organisms; Archaea; Euryarchaeota; Stenosarchaea group; Halobacteria; Natrialbales; Natrialbaceae; Natrinema; unclassified Natrinema; Natrinema sp. J7-2;
Salinarchaeum sp. Harcht-Bsk1	SaspA01.AGN00123.1	R4W624	L593_00840	aLHR1	cellular organisms; Archaea; Euryarchaeota; Stenosarchaea group; Halobacteria; Natrialbales; Natrialbaceae; Salinarchaeum; unclassified Salinarchaeum; Salinarchaeum sp. Harcht-Bsk1;
Methanohalophilus halophilus Z-7982	MhalA01.APH39591.1	A0A1L3Q488	BHR79_08935	aLHR1	cellular organisms; Archaea; Euryarchaeota; Stenosarchaea group; Methanomicrobia; Methanosarcinales; Methanosarcinaceae; Methanohalophilus; Methanohalophilus halophilus;
Methanosarcina barkeri Fusaro	MbarA01.AAZ70613.1	Q46BX9	Mbar_A1670	aLHR1	cellular organisms; Archaea; Euryarchaeota; Stenosarchaea group; Methanomicrobia; Methanosarcinales; Methanosarcinaceae; Methanosarcina; Methanosarcina barkeri; Methanosarcina barkeri str. Fusaro;
Methanohalobium evestigatum Z-7303	MeveA01.ADI73433.1	D7E891	Metev_0521	aLHR1	cellular organisms; Archaea; Euryarchaeota; Stenosarchaea group; Methanomicrobia; Methanosarcinales; Methanosarcinaceae; Methanohalobium; Methanohalobium evestigatum; Methanohalobium evestigatum Z-7303;
Methanosalsum zhilinae DSM 4017	MzhiA01.AEH61091.1	F7XMR6	Mzhil_1237	aLHR1	cellular organisms; Archaea; Euryarchaeota; Stenosarchaea group; Methanomicrobia; Methanosarcinales; Methanosarcinaceae; Methanosalsum; Methanosalsum zhilinae; Methanosalsum zhilinae DSM 4017;
Heimdallarchaeota archaeon (strain LC_2)	QheiB01.HEIMC2_1657	A0A1Q9P2H5		aLHR2	cellular organisms; Archaea; Asgard group; Candidatus Heimdallarchaeota; Candidatus Heimdallarchaeota archaeon LC_2;
Methanocella paludicola SANAE	MepaA01.BAI62346.1	D1Z0X4	MCP_2274	aLHR2	cellular organisms; Archaea; Euryarchaeota; Stenosarchaea group; Methanomicrobia; Methanocellales; Methanocellaceae; Methanocella; Methanocella paludicola; Methanocella paludicola SANAE;
Methanosaeta thermophila PT	MethA01.ABK14324.1	A0B6K0	Mthe_0533	aLHR2	cellular organisms; Archaea; Euryarchaeota; Stenosarchaea group; Methanomicrobia; Methanosarcinales; Methanotrichaceae; Methanothrix; Methanothrix thermoacetophila; Methanothrix thermoacetophila PT;
Methanoculleus marisnigri JR1	MmarA01.ABN57437.1	A3CVN7	Memar_1508	aLHR2	cellular organisms; Archaea; Euryarchaeota; Stenosarchaea group; Methanomicrobia; Methanomicrobiales; Methanomicrobiaceae; Methanoculleus; Methanoculleus marisnigri; Methanoculleus marisnigri JR1;
Methanococcus maripaludis C5	MemaA01.ABO34759.1	A4FX30	MmarC5_0444	aLHR2	cellular organisms; Archaea; Euryarchaeota; Methanomada group; Methanococci; Methanococcales; Methanococcaceae; Methanococcus; Methanococcus maripaludis; Methanococcus maripaludis C5;
Halobiforma lacisalsi AJ5	HalaA01.APW98028.1	M0L7Z6	CHINAEXTREME_09645	aLHR2	cellular organisms; Archaea; Euryarchaeota; Stenosarchaea group; Halobacteria; Natrialbales; Natrialbaceae; Halobiforma; Halobiforma lacisalsi; Halobiforma lacisalsi AJ5;
Halobacterium hubeiense JI20-1	HhubA01.LHR2	A0A0U5H4T1	HHUB_2630	aLHR2	cellular organisms; Archaea; Euryarchaeota; Stenosarchaea group; Halobacteria; Halobacteriales; Halobacteriaceae; Halobacterium; Halobacterium hubeiense;
Halorubrum lacusprofundi ATCC 49239	HlacA01.ACM56845.1	B9LNA7	Hlac_1253	aLHR2	cellular organisms; Archaea; Euryarchaeota; Stenosarchaea group; Halobacteria; Haloferacales; Halorubraceae; Halorubrum; Halorubrum lacusprofundi; Halorubrum lacusprofundi ATCC 49239;
Candidatus Nitrosocaldus cavascurensis SCU2	NcavA01.SPC34143.1	A0A2K5AR62	NCAV_0966	aLHR2	cellular organisms; Archaea; TACK group; Thaumarchaeota; Nitrososphaeria; Candidatus Nitrosocaldales; Candidatus Nitrosocaldaceae; Candidatus Nitrosocaldus; Candidatus Nitrosocaldus cavascurensis;
Candidatus Heimdallarchaeota archaeon	QheiL01.E3J43_891	A0A523XQW6		aLHR2	cellular organisms; Archaea; Asgard group; Candidatus Heimdallarchaeota; Candidatus Heimdallarchaeota archaeon;
Candidatus Heimdallarchaeota archaeon AB_125	QheiC01.HEIMAB125_273	A0A1Q9PDY7		aLHR2	cellular organisms; Archaea; Asgard group; Candidatus Heimdallarchaeota; Candidatus Heimdallarchaeota archaeon AB_125;
Candidatus Methanomassiliicoccus intestinalis Issoire-Mx1	MeinA01.AGN27168.1	R9TCJ6	MMINT_18950	aLHR2	cellular organisms; Archaea; Euryarchaeota; Diaforarchaea group; Thermoplasmata; Methanomassiliicoccales; Methanomassiliicoccaceae; Methanomassiliicoccus; Candidatus Methanomassiliicoccus intestinalis; Candidatus Methanomassiliicoccus intestinalis Issoire-Mx1;
methanogenic archaeon ISO4-H5	QmetA01.AMH93750.1	A0A120MHW5	AR505_0025	aLHR2	cellular organisms; Archaea; Euryarchaeota; Diaforarchaea group; Thermoplasmata; unclassified Thermoplasmata; methanogenic archaeon ISO4-H5;
Candidatus Methanoplasma termitum MpT1	MterA01.AIZ57285.1	A0A0A7LDM5	Mpt1_c14290	aLHR2	cellular organisms; Archaea; Euryarchaeota; Diaforarchaea group; Thermoplasmata; Methanomassiliicoccales; Methanomassiliicoccaceae; Candidatus Methanoplasma; Candidatus Methanoplasma termitum;
Aciduliprofundum boonei T469	AbooA01.ADD08009.1	D3TBS4	Aboo_0197	aLHR2	cellular organisms; Archaea; Euryarchaeota; Diaforarchaea group; DHVE2 group; Aciduliprofundum; Aciduliprofundum boonei; Aciduliprofundum boonei T469;
Thermoplasma acidophilum DSM1728	TaciA01.TA0587	Q9HKL0		aLHR2	cellular organisms; Archaea; Euryarchaeota; Diaforarchaea group; Thermoplasmata; Thermoplasmatales; Thermoplasmataceae; Thermoplasma; Thermoplasma acidophilum; Thermoplasma acidophilum DSM 1728;
Thermoplasma volcanium GSS1	TvolA01.TVG0641301	Q97B15		aLHR2	cellular organisms; Archaea; Euryarchaeota; Diaforarchaea group; Thermoplasmata; Thermoplasmatales; Thermoplasmataceae; Thermoplasma; Thermoplasma volcanium; Thermoplasma volcanium GSS1;
Cuniculiplasma divulgatum S5(T) (=JCM 30642; =VKM B-2941)	CdivA01.SIM69212.1	A0A1N5V7N9	CSP5_1275	aLHR2	cellular organisms; Archaea; Euryarchaeota; Diaforarchaea group; Thermoplasmata; Thermoplasmatales; Cuniculiplasmataceae; Cuniculiplasma; Cuniculiplasma divulgatum;
uncultured archaeon	QaasA01.AKA49373.1	A0A0D5ZHD9	IX51_09990	aLHR2	cellular organisms; Archaea; environmental samples; uncultured archaeon;
Ferroplasma acidarmanus fer1	FaciA01.AGO61657.1	S0AS83	FACI_IFERC00001G1677	aLHR2	cellular organisms; Archaea; Euryarchaeota; Diaforarchaea group; Thermoplasmata; Thermoplasmatales; Ferroplasmaceae; Ferroplasma; Ferroplasma acidarmanus; Ferroplasma acidarmanus fer1;
Picrophilus torridus DSM 9790	PtorA01.AAT43465.1	Q6L0N7	PTO0880	aLHR2	cellular organisms; Archaea; Euryarchaeota; Diaforarchaea group; Thermoplasmata; Thermoplasmatales; Picrophilaceae; Picrophilus; Picrophilus torridus; Picrophilus torridus DSM 9790;
archaeon GW2011_AR10	DiapA01.AJF59755.1	A0A0B5HDQ1	QT03_C0001G0254	aLHR2	cellular organisms; Archaea; unclassified Archaea; archaeon GW2011_AR10;
archaeon GW2011_AR20	WoesA01.AJF62857.1	A0A0B5HX15	QT11_C0001G0716	aLHR2	cellular organisms; Archaea; unclassified Archaea; archaeon GW2011_AR20;
Nanohaloarchaea archaeon SG9	NarcA01.AOV94824.1	A0A1D8MS74	AQV86_02765	aLHR2	cellular organisms; Archaea; Euryarchaeota; Stenosarchaea group; Candidatus Nanohaloarchaeota; Nanohaloarchaea; unclassified Nanohaloarchaea; Nanohaloarchaea archaeon SG9;
Candidatus Mancarchaeum acidiphilum Mia14	MarcA01.ASI13422.1	A0A218NLU6	Mia14_0079	aLHR2	cellular organisms; Archaea; DPANN group; Candidatus Micrarchaeota; Candidatus Mancarchaeum; Candidatus Mancarchaeum acidiphilum;
Thermofilum pendens Hrk 5	TpenA01.ABL78331.1	A1RYQ1	Tpen_0930	aLHR2	cellular organisms; Archaea; TACK group; Crenarchaeota; Thermoprotei; Thermoproteales; Thermofilaceae; Thermofilum; Thermofilum pendens; Thermofilum pendens Hrk 5;
Candidatus Korarchaeum cryptofilum OPF8	CkorA01.ACB07828.1	B1L5U9	Kcr_1082	aLHR2	cellular organisms; Archaea; TACK group; Candidatus Korarchaeota; Candidatus Korarchaeum; Candidatus Korarchaeum cryptofilum; Candidatus Korarchaeum cryptofilum OPF8;
Geoglobus acetivorans SBH6	GaceA01.AIY90334.1	A0A0A7GE98	GACE_1293	aLHR2	cellular organisms; Archaea; Euryarchaeota; Archaeoglobi; Archaeoglobales; Archaeoglobaceae; Geoglobus; Geoglobus acetivorans;
Nanoarchaeum equitans Kin4-M	NequA01.AAR38857.1	Q74N37	NEQ003	aLHR2	cellular organisms; Archaea; DPANN group; Nanoarchaeota; Nanoarchaeales; Nanoarchaeaceae; Nanoarchaeum; Nanoarchaeum equitans; Nanoarchaeum equitans Kin4-M;
Methanocaldococcus jannaschii DSM 2661	MjanA01.AAB98279.1	Q57742	MJ_0294	aLHR2	cellular organisms; Archaea; Euryarchaeota; Methanomada group; Methanococci; Methanococcales; Methanocaldococcaceae; Methanocaldococcus; Methanocaldococcus jannaschii; Methanocaldococcus jannaschii DSM 2661;
Thermococcus barophilus MP	TbarA01.ADT83510.1	F0LJX3	TERMP_00533	aLHR2	cellular organisms; Archaea; Euryarchaeota; Thermococci; Thermococcales; Thermococcaceae; Thermococcus; Thermococcus barophilus; Thermococcus barophilus MP;
Ignicoccus hospitalis KIN4/I	IhosA01.ABU82349.1	A8ABP7	Igni_1172	aLHR2	cellular organisms; Archaea; TACK group; Crenarchaeota; Thermoprotei; Desulfurococcales; Desulfurococcaceae; Ignicoccus; Ignicoccus hospitalis; Ignicoccus hospitalis KIN4/I;
Sulfolobus islandicus L.S.2.15	SislA01.ACP36165.1	C3MJ78	LS215_2178	aLHR2	cellular organisms; Archaea; TACK group; Crenarchaeota; Thermoprotei; Sulfolobales; Sulfolobaceae; Sulfolobus; Sulfolobus islandicus; Sulfolobus islandicus L.S.2.15;
Sulfodiicoccus acidiphilus HS-1	SiiaA01.BBD73903.1	A0A348B6V1	HS1genome_2292	aLHR2	cellular organisms; Archaea; TACK group; Crenarchaeota; Thermoprotei; Sulfolobales; Sulfolobaceae; Sulfodiicoccus; Sulfodiicoccus acidiphilus;
Ignisphaera aggregans DSM 17230	IaggA01.ADM27320.1	E0SRX0	Igag_0482	aLHR2	cellular organisms; Archaea; TACK group; Crenarchaeota; Thermoprotei; Desulfurococcales; Desulfurococcaceae; Ignisphaera; Ignisphaera aggregans; Ignisphaera aggregans DSM 17230;
Hyperthermus butylicus DSM 5456	HbutA01.ABM80789.1	A2BLC8	Hbut_0941	aLHR2	cellular organisms; Archaea; TACK group; Crenarchaeota; Thermoprotei; Desulfurococcales; Pyrodictiaceae; Hyperthermus; Hyperthermus butylicus; Hyperthermus butylicus DSM 5456;
Staphylothermus hellenicus DSM 12710	SellA01.ADI32204.1	D7D8V8	Shell_1101	aLHR2	cellular organisms; Archaea; TACK group; Crenarchaeota; Thermoprotei; Desulfurococcales; Desulfurococcaceae; Staphylothermus; Staphylothermus hellenicus; Staphylothermus hellenicus DSM 12710;
Acidilobus saccharovorans 345-15	AsacA01.ADL18431.1	D9PZE3	ASAC_0022	aLHR2	cellular organisms; Archaea; TACK group; Crenarchaeota; Thermoprotei; Acidilobales; Acidilobaceae; Acidilobus; Acidilobus saccharovorans; Acidilobus saccharovorans 345-15;
Caldisphaera lagunensis DSM 15908	ClagA01.AFZ71266.1	L0ABM3	Calag_1568	aLHR2	cellular organisms; Archaea; TACK group; Crenarchaeota; Thermoprotei; Acidilobales; Caldisphaeraceae; Caldisphaera; Caldisphaera lagunensis; Caldisphaera lagunensis DSM 15908;
Fervidicoccus fontis Kam940	FfonA01.AFH42101.1	H9ZZE4	FFONT_0109	aLHR2	cellular organisms; Archaea; TACK group; Crenarchaeota; Thermoprotei; Fervidicoccales; Fervidicoccaceae; Fervidicoccus; Fervidicoccus fontis; Fervidicoccus fontis Kam940;
Aeropyrum camini SY1	AcamA01.BAN90810.1	U3TFJ2	ACAM_1341	aLHR2	cellular organisms; Archaea; TACK group; Crenarchaeota; Thermoprotei; Desulfurococcales; Desulfurococcaceae; Aeropyrum; Aeropyrum camini; Aeropyrum camini SY1 = JCM 12091;
Candidatus Heimdallarchaeota archaeon LC_3	QheiA01.HEIMC3_1987	A0A1Q9NHJ0			cellular organisms; Archaea; Asgard group; Candidatus Heimdallarchaeota; Candidatus Heimdallarchaeota archaeon LC_3;
Caldisphaera lagunensis DSM 15908	ClagA01.AFZ70156.1	L0A8K1	Calag_0382	aLHR3	cellular organisms; Archaea; TACK group; Crenarchaeota; Thermoprotei; Acidilobales; Caldisphaeraceae; Caldisphaera; Caldisphaera lagunensis; Caldisphaera lagunensis DSM 15908;
Acidilobus sp. 7A	AclsA01.AMD30321.1	A0A120K625	SE86_01690	aLHR3	cellular organisms; Archaea; TACK group; Crenarchaeota; Thermoprotei; Acidilobales; Acidilobaceae; Acidilobus; unclassified Acidilobus; Acidilobus sp. 7A;
Pyrolobus fumarii 1A	PfumA01.AEM38835.1	G0EEL3	Pyrfu_0966	aLHR3	cellular organisms; Archaea; TACK group; Crenarchaeota; Thermoprotei; Desulfurococcales; Pyrodictiaceae; Pyrolobus; Pyrolobus fumarii; Pyrolobus fumarii 1A;
Pyrodictium delaneyi Su06	PdelA01.ALL01749.1	A0A0P0N4N3	Pyrde_1706	aLHR3	cellular organisms; Archaea; TACK group; Crenarchaeota; Thermoprotei; Desulfurococcales; Pyrodictiaceae; Pyrodictium; Pyrodictium delaneyi;
Hyperthermus butylicus DSM 5456	HbutA01.ABM80823.1	A2BLG2	Hbut_0975	aLHR3	cellular organisms; Archaea; TACK group; Crenarchaeota; Thermoprotei; Desulfurococcales; Pyrodictiaceae; Hyperthermus; Hyperthermus butylicus; Hyperthermus butylicus DSM 5456;
Ignicoccus hospitalis KIN4/I	IhosA01.ABU81375.1	A8A8X3	Igni_0191	aLHR3	cellular organisms; Archaea; TACK group; Crenarchaeota; Thermoprotei; Desulfurococcales; Desulfurococcaceae; Ignicoccus; Ignicoccus hospitalis; Ignicoccus hospitalis KIN4/I;
Ignicoccus islandicus DSM 13165	IislA01.ALU11634.1	A0A0U2VC08	EYM_03255	aLHR3	cellular organisms; Archaea; TACK group; Crenarchaeota; Thermoprotei; Desulfurococcales; Desulfurococcaceae; Ignicoccus; Ignicoccus islandicus; Ignicoccus islandicus DSM 13165;
Sulfodiicoccus acidiphilus HS-1	SiiaA01.BBD72649.1	A0A348B397	HS1genome_1038	aLHR3	cellular organisms; Archaea; TACK group; Crenarchaeota; Thermoprotei; Sulfolobales; Sulfolobaceae; Sulfodiicoccus; Sulfodiicoccus acidiphilus;
Sulfolobus islandicus L.S.2.15	SislA01.ACP35354.1	C3MPP1	LS215_1346	aLHR3	cellular organisms; Archaea; TACK group; Crenarchaeota; Thermoprotei; Sulfolobales; Sulfolobaceae; Sulfolobus; Sulfolobus islandicus; Sulfolobus islandicus L.S.2.15;
Sulfolobus acidocaldarius DSM 639	SaciA01.AAY80655.1	Q4J975	Saci_1320	aLHR3	cellular organisms; Archaea; TACK group; Crenarchaeota; Thermoprotei; Sulfolobales; Sulfolobaceae; Sulfolobus; Sulfolobus acidocaldarius; Sulfolobus acidocaldarius DSM 639;
Sulfolobus tokodaii 7	StokA01.BAB66335.1	Q971T5	STK_12910	aLHR3	cellular organisms; Archaea; TACK group; Crenarchaeota; Thermoprotei; Sulfolobales; Sulfolobaceae; Sulfurisphaera; Sulfurisphaera tokodaii; Sulfurisphaera tokodaii str. 7;
Metallosphaera hakonensis HO1-1	MhakA01.AWR99945.1	A0A2U9IVB2	DFR87_09910	aLHR3	cellular organisms; Archaea; TACK group; Crenarchaeota; Thermoprotei; Sulfolobales; Sulfolobaceae; Metallosphaera; Metallosphaera hakonensis;
Acidianus brierleyi DSM 1651	AbriA01.AWR95028.1	A0A2U9IG60	DFR85_10890	aLHR3	cellular organisms; Archaea; TACK group; Crenarchaeota; Thermoprotei; Sulfolobales; Sulfolobaceae; Acidianus; Acidianus brierleyi;
Acidianus manzaensis YN-25	AmanA01.ARM76587.1	A0A1W6K268	B6F84_11535	aLHR3	cellular organisms; Archaea; TACK group; Crenarchaeota; Thermoprotei; Sulfolobales; Sulfolobaceae; Acidianus; Acidianus manzaensis;
Thermofilum pendens Hrk 5	TpenA01.ABL78749.1	A1RZW9	Tpen_1352		cellular organisms; Archaea; TACK group; Crenarchaeota; Thermoprotei; Thermoproteales; Thermofilaceae; Thermofilum; Thermofilum pendens; Thermofilum pendens Hrk 5;
Thermogladius calderae 1633	TcelA01.AFK51053.1	I3TE65	TCELL_0629		cellular organisms; Archaea; TACK group; Crenarchaeota; Thermoprotei; Desulfurococcales; Desulfurococcaceae; Thermogladius; Thermogladius calderae; Thermogladius calderae 1633;
Methanosarcina sp. MTP4	MsspA01.AKB25340.1	A0A0E3NZL1	MSMTP_1871	LHR-like	cellular organisms; Archaea; Euryarchaeota; Stenosarchaea group; Methanomicrobia; Methanosarcinales; Methanosarcinaceae; Methanosarcina; unclassified Methanosarcina; Methanosarcina sp. MTP4;
Candidatus Methanomassiliicoccus intestinalis Issoire-Mx1	MeinA01.AGN25502.1	R9T3P8	MMINT_00920	LHR-like	cellular organisms; Archaea; Euryarchaeota; Diaforarchaea group; Thermoplasmata; Methanomassiliicoccales; Methanomassiliicoccaceae; Methanomassiliicoccus; Candidatus Methanomassiliicoccus intestinalis; Candidatus Methanomassiliicoccus intestinalis Issoire-Mx1;
Aciduliprofundum sp. MAR08-339	AispA01.AGB05083.1	L0HNZ8	AciM339_1221	LHR-like	cellular organisms; Archaea; Euryarchaeota; Diaforarchaea group; DHVE2 group; Aciduliprofundum; unclassified Aciduliprofundum; Aciduliprofundum sp. MAR08-339;
Methanothermobacter marburgensis Marburg	MtmaA01.ADL58346.1	D9PVU8	MTBMA_c07510	LHR-like	cellular organisms; Archaea; Euryarchaeota; Methanomada group; Methanobacteria; Methanobacteriales; Methanobacteriaceae; Methanothermobacter; Methanothermobacter marburgensis; Methanothermobacter marburgensis str. Marburg;
Methanobacterium congolense	MongA01.SCG85429.1	A0A1D3L1Q8	MCBB_0865	LHR-like	cellular organisms; Archaea; Euryarchaeota; Methanomada group; Methanobacteria; Methanobacteriales; Methanobacteriaceae; Methanobacterium; Methanobacterium congolense;
Methanobrevibacter sp. AbM4	MbbsA01.AGN16296.1	R9SJF8	Abm4_0389	LHR-like	cellular organisms; Archaea; Euryarchaeota; Methanomada group; Methanobacteria; Methanobacteriales; Methanobacteriaceae; Methanobrevibacter; unclassified Methanobrevibacter; Methanobrevibacter sp. AbM4;
Methanosphaera sp. BMS	MsphA01.AWX31849.1	A0A2Z4L660	AW729_01525	LHR-like	cellular organisms; Archaea; Euryarchaeota; Methanomada group; Methanobacteria; Methanobacteriales; Methanobacteriaceae; Methanosphaera; unclassified Methanosphaera; Methanosphaera sp. BMS;
Methanocorpusculum labreanum Z	MlabA01.ABN06932.1	A2SRH6	Mlab_0761	LHR-like	cellular organisms; Archaea; Euryarchaeota; Stenosarchaea group; Methanomicrobia; Methanomicrobiales; Methanocorpusculaceae; Methanocorpusculum; Methanocorpusculum labreanum; Methanocorpusculum labreanum Z;
Methanosphaerula palustris E1-9c	MpalA01.ACL15960.1	B8GFB2	Mpal_0589	LHR-like	cellular organisms; Archaea; Euryarchaeota; Stenosarchaea group; Methanomicrobia; Methanomicrobiales; Methanoregulaceae; Methanosphaerula; Methanosphaerula palustris; Methanosphaerula palustris E1-9c;
Methanoregula formicica SMSP	MforA01.AGB01360.1	L0HBG5	Metfor_0280	LHR-like	cellular organisms; Archaea; Euryarchaeota; Stenosarchaea group; Methanomicrobia; Methanomicrobiales; Methanoregulaceae; Methanoregula; Methanoregula formicica; Methanoregula formicica SMSP;
Methanoregula boonei 6A8	CmetA01.ABS56939.1	A7IB28	Mboo_2425	LHR-like	cellular organisms; Archaea; Euryarchaeota; Stenosarchaea group; Methanomicrobia; Methanomicrobiales; Methanoregulaceae; Methanoregula; Methanoregula boonei; Methanoregula boonei 6A8;
methanogenic archaeon ISO4-H5	QmetA01.AMH94833.1	A0A0X8V1I2	AR505_1115	LHR-like	cellular organisms; Archaea; Euryarchaeota; Diaforarchaea group; Thermoplasmata; unclassified Thermoplasmata; methanogenic archaeon ISO4-H5;
Methanoculleus bourgensis MS2T	MbouA01.CCJ35585.1	I7KY95	BN140_0662	LHR-like	cellular organisms; Archaea; Euryarchaeota; Stenosarchaea group; Methanomicrobia; Methanomicrobiales; Methanomicrobiaceae; Methanoculleus; Methanoculleus bourgensis; Methanoculleus bourgensis MS2;

## Sheet: representative
Redundant sequences >70% identity to representative
Organism	Representing sequence id	Uniprot Ac	Locus-tag	Orthologous Group	Lineage
Sulfolobus islandicus REY15A	SislA01.ACP35833.1	F0NHT0	SiRe_1605	aLHR1	cellular organisms; Archaea; TACK group; Crenarchaeota; Thermoprotei; Sulfolobales; Sulfolobaceae; Sulfolobus; Sulfolobus islandicus; Sulfolobus islandicus REY15A;
Sulfolobus solfataricus P2	SislA01.ACP36165.1	P95949	SSO0112	aLHR2	cellular organisms; Archaea; TACK group; Crenarchaeota; Thermoprotei; Sulfolobales; Sulfolobaceae; Saccharolobus; Saccharolobus solfataricus; Saccharolobus solfataricus P2;
Sulfolobus acidocaldarius DSM 639	SislA01.ACP36165.1	Q4J8R1	Saci_1500	aLHR2	cellular organisms; Archaea; TACK group; Crenarchaeota; Thermoprotei; Sulfolobales; Sulfolobaceae; Sulfolobus; Sulfolobus acidocaldarius; Sulfolobus acidocaldarius DSM 639;
Methanothermobacter thermautotrophicus Delta H	MjanA01.AAB98279.1	O27830	MTH_1802	aLHR2	cellular organisms; Archaea; Euryarchaeota; Methanomada group; Methanobacteria; Methanobacteriales; Methanobacteriaceae; Methanothermobacter; Methanothermobacter thermautotrophicus; Methanothermobacter thermautotrophicus str. Delta H;
Pyrococcus abyssi Orsay	MjanA01.AAB98279.1	Q9UZM4	PAB0744	aLHR2	cellular organisms; Archaea; Euryarchaeota; Thermococci; Thermococcales; Thermococcaceae; Pyrococcus; Pyrococcus abyssi; Pyrococcus abyssi GE5;
