# Supplementary material for: Phylogenetic Diversity of Lhr Proteins and Biochemical Activities of the Thermococcales aLhr2 DNA/RNA Helicase
Source: Preprints.org preprint supplement (doi:10.20944/preprints202103.0477.v1), 2021-03-18
Supplement: Supplementary file 3 [file tableS2B-sequence-identifiers-bacterial-LHR.xlsx]

## Sheet: bacterial LHR
Organism	Sequence identifier	Uniprot Ac	Locus-tag	Orthologous Group	Lineage
Desulfitobacterium hafniense Y51	DhafA01.BAE85563.1	Q24QX9	DSY3774	bLHR-HTH	cellular organisms; Bacteria; Terrabacteria group; Firmicutes; Clostridia; Clostridiales; Peptococcaceae; Desulfitobacterium; Desulfitobacterium hafniense; Desulfitobacterium hafniense Y51;
Erysipelotrichaceae bacterium I46	ErbaA01.ANU68399.1	A0A1C7HPU7	A4V01_05305	bLHR-HTH	cellular organisms; Bacteria; Terrabacteria group; Firmicutes; Erysipelotrichia; Erysipelotrichales; Erysipelotrichaceae; unclassified Erysipelotrichaceae; Erysipelotrichaceae bacterium I46;
Lachnoclostridium phytofermentans ISDg	CphyA01.ABX41095.1	A9KJU0	Cphy_0708	bLHR-HTH	cellular organisms; Bacteria; Terrabacteria group; Firmicutes; Clostridia; Clostridiales; Lachnospiraceae; Lachnoclostridium; Lachnoclostridium phytofermentans; Lachnoclostridium phytofermentans ISDg;
Haliangium ochraceum DSM 14365	HochA01.ACY19018.1	D0LRM6	Hoch_6550	bLHR-HTH	cellular organisms; Bacteria; Proteobacteria; delta/epsilon subdivisions; Deltaproteobacteria; Myxococcales; Nannocystineae; Kofleriaceae; Haliangium; Haliangium ochraceum; Haliangium ochraceum DSM 14365;
Minicystis rosea DSM 24000	MiroA01.APR88010.1	A0A1L6M1S0	A7982_13359	bLHR-HTH	cellular organisms; Bacteria; Proteobacteria; delta/epsilon subdivisions; Deltaproteobacteria; Myxococcales; Sorangiineae; Sorangiineae incertae sedis; Minicystis; Minicystis rosea;
Chondromyces crocatus Cm c5	CcroA01.AKT39609.1	A0A0K1EFJ1	CMC5_037580	bLHR-HTH	cellular organisms; Bacteria; Proteobacteria; delta/epsilon subdivisions; Deltaproteobacteria; Myxococcales; Sorangiineae; Polyangiaceae; Chondromyces; Chondromyces crocatus;
Sorangium cellulosum So ce 56	ScelA01.LHR1	A9GB61	sce2802	bLHR-HTH	cellular organisms; Bacteria; Proteobacteria; delta/epsilon subdivisions; Deltaproteobacteria; Myxococcales; Sorangiineae; Polyangiaceae; Sorangium; Sorangium cellulosum; Sorangium cellulosum So ce56;
Myxococcus macrosporus HW-1	MfulA01.AEI62670.1	F8CJF7	LILAB_03725	bLHR-HTH	cellular organisms; Bacteria; Proteobacteria; delta/epsilon subdivisions; Deltaproteobacteria; Myxococcales; Cystobacterineae; Myxococcaceae; Corallococcus; Corallococcus macrosporus;
Anaeromyxobacter sp. Fw109-5	AnspA01.ABS24621.1	A7H7C5	Anae109_0406	bLHR-HTH	cellular organisms; Bacteria; Proteobacteria; delta/epsilon subdivisions; Deltaproteobacteria; Myxococcales; Cystobacterineae; Anaeromyxobacteraceae; Anaeromyxobacter; unclassified Anaeromyxobacter; Anaeromyxobacter sp. Fw109-5;
Nitrospira defluvii defluvii	NdefA01.CBK40924.1	D8PCG5	NIDE1167	bLHR-HTH	cellular organisms; Bacteria; Nitrospirae; Nitrospira; Nitrospirales; Nitrospiraceae; Nitrospira; Nitrospira defluvii;
Candidatus Nitrospira inopinata	NinoA01.CUQ67597.1	A0A0S4KW25	NITINOP_2625	bLHR-HTH	cellular organisms; Bacteria; Nitrospirae; Nitrospira; Nitrospirales; Nitrospiraceae; Nitrospira; Candidatus Nitrospira inopinata;
Nitrospira japonica	NjapA01.SLM48324.1	A0A1W1I5Q3	NSJP_2152	bLHR-HTH	cellular organisms; Bacteria; Nitrospirae; Nitrospira; Nitrospirales; Nitrospiraceae; Nitrospira; Nitrospira japonica;
Candidatus Solibacter usitatus Ellin6076	SusiA01.ABJ86782.1	Q01U88	Acid_5837	bLHR-HTH	cellular organisms; Bacteria; Acidobacteria; Acidobacteriia; Bryobacterales; Solibacteraceae; Candidatus Solibacter; Candidatus Solibacter usitatus; Candidatus Solibacter usitatus Ellin6076;
Legionella fallonii LLAP-10	LfalA01.CEG57226.1	A0A098G5H1	LFA_1828	bLHR-HTH	cellular organisms; Bacteria; Proteobacteria; Gammaproteobacteria; Legionellales; Legionellaceae; Legionella; Legionella fallonii; Legionella fallonii LLAP-10;
Legionella hackeliae ATCC35250	LhacA01.CEK11138.1	A0A0A8UR07	LHA_2114	bLHR-HTH	cellular organisms; Bacteria; Proteobacteria; Gammaproteobacteria; Legionellales; Legionellaceae; Legionella; Legionella hackeliae;
Legionella longbeachae NSW150	LlonA01.CBJ11122.1	D3HQF2	LLO_0778	bLHR-HTH	cellular organisms; Bacteria; Proteobacteria; Gammaproteobacteria; Legionellales; Legionellaceae; Legionella; Legionella longbeachae; Legionella longbeachae NSW150;
Candidatus Koribacter versatilis Ellin345	AbacA01.ABF42770.1	Q1IK30	Acid345_3770	bLHR-HTH	cellular organisms; Bacteria; Acidobacteria; Acidobacteriia; Acidobacteriales; Acidobacteriaceae; Candidatus Koribacter; Candidatus Koribacter versatilis; Candidatus Koribacter versatilis Ellin345;
Granulicella tundricola MP5ACTX9	AcisA01.ADW67881.1	E8X115	AciX9_0813	bLHR-HTH	cellular organisms; Bacteria; Acidobacteria; Acidobacteriia; Acidobacteriales; Acidobacteriaceae; Granulicella; Granulicella tundricola; Granulicella tundricola MP5ACTX9;
Acidobacterium capsulatum ATCC 51196	AcapA01.ACO33139.1	C1F8X5	ACP_2035	bLHR-HTH	cellular organisms; Bacteria; Acidobacteria; Acidobacteriia; Acidobacteriales; Acidobacteriaceae; Acidobacterium; Acidobacterium capsulatum; Acidobacterium capsulatum ATCC 51196;
Terriglobus roseus DSM 18391	TeroA01.AFL86718.1	I3ZBV0	Terro_0369	bLHR-HTH	cellular organisms; Bacteria; Acidobacteria; Acidobacteriia; Acidobacteriales; Acidobacteriaceae; Terriglobus; Terriglobus roseus; Terriglobus roseus DSM 18391;
Pirellula staleyi DSM 6068	PstaA01.ADB16272.1	D2QY58	Psta_1597	bLHR-HTH	cellular organisms; Bacteria; PVC group; Planctomycetes; Planctomycetia; Pirellulales; Pirellulaceae; Pirellula; Pirellula staleyi; Pirellula staleyi DSM 6068;
Planctomyces sp. SH-PL14	PcmyA01.CSHB	A0A142WUN8	VT03_11390	bLHR-HTH	cellular organisms; Bacteria; PVC group; Planctomycetes; Planctomycetia; Planctomycetales; Planctomycetaceae; Planctomyces; unclassified Planctomyces; Planctomyces sp. SH-PL14;
Rubinisphaera brasiliensis DSM 5305	PbraA01.ADY57885.1	F0SPI1	Plabr_0256	bLHR-HTH	cellular organisms; Bacteria; PVC group; Planctomycetes; Planctomycetia; Planctomycetales; Planctomycetaceae; Rubinisphaera; Rubinisphaera brasiliensis; Rubinisphaera brasiliensis DSM 5305;
Sandaracinus amylolyticus DSM 53668	SamyA01.AKF05442.1	A0A0F6W235	DB32_002591	bLHR-HTH	cellular organisms; Bacteria; Proteobacteria; delta/epsilon subdivisions; Deltaproteobacteria; Myxococcales; Sorangiineae; Sandaracinaceae; Sandaracinus; Sandaracinus amylolyticus;
Labilithrix luteola DSM 27648	LlutA01.AKV00634.1	A0A0K1Q4G3	AKJ09_07297	bLHR-HTH	cellular organisms; Bacteria; Proteobacteria; delta/epsilon subdivisions; Deltaproteobacteria; Myxococcales; Sorangiineae; Labilitrichaceae; Labilithrix; Labilithrix luteola;
Sulfurifustis variabilis skN76	SvarA01.BAU47355.1	A0A1B4V244	SVA_0776	bLHR-HTH	cellular organisms; Bacteria; Proteobacteria; Gammaproteobacteria; Acidiferrobacterales; Acidiferrobacteraceae; Sulfurifustis; Sulfurifustis variabilis;
Methylococcus capsulatus Bath	McapA01.AAU92141.1	Q608B8	MCA1579	bLHR-HTH	cellular organisms; Bacteria; Proteobacteria; Gammaproteobacteria; Methylococcales; Methylococcaceae; Methylococcus; Methylococcus capsulatus; Methylococcus capsulatus str. Bath;
Pseudohongiella spirulinae KCTC 32221	PspiA01.ALO45091.1	A0A0S2KAH9	PS2015_404	bLHR-HTH	cellular organisms; Bacteria; Proteobacteria; Gammaproteobacteria; Gammaproteobacteria incertae sedis; Pseudohongiella; Pseudohongiella spirulinae;
Turneriella parva DSM 21527	TupaA01.AFM14730.1	I4BBS3	Turpa_4097	bLHR-HTH	cellular organisms; Bacteria; Spirochaetes; Spirochaetia; Leptospirales; Leptospiraceae; Turneriella; Turneriella parva; Turneriella parva DSM 21527;
Wenzhouxiangella marina KCTC 42284	WmarA01.AKS41954.1	A0A0K0XW71	WM2015_1584	bLHR-HTH	cellular organisms; Bacteria; Proteobacteria; Gammaproteobacteria; Chromatiales; Wenzhouxiangellaceae; Wenzhouxiangella; Wenzhouxiangella marina;
Immundisolibacter cernigliae TR3.2	IcerA01.ANX05083.1	A0A1B1YWU0	PG2T_13455	bLHR-HTH	cellular organisms; Bacteria; Proteobacteria; Gammaproteobacteria; Immundisolibacterales; Immundisolibacteraceae; Immundisolibacter; Immundisolibacter cernigliae;
Methylomicrobium alcaliphilum 20Z	MalcA01.CCE22067.1	G4SXL2	MEALZ_0367	bLHR-HTH	cellular organisms; Bacteria; Proteobacteria; Gammaproteobacteria; Methylococcales; Methylococcaceae; Methylomicrobium; Methylomicrobium alcaliphilum;
Acidihalobacter prosperus F5	AcprA01.AOU97896.1	A0A1D8IN48	BI364_07900	bLHR-HTH	cellular organisms; Bacteria; Proteobacteria; Gammaproteobacteria; Chromatiales; Ectothiorhodospiraceae; Acidihalobacter; Acidihalobacter prosperus;
Candidatus Tenderia electrophaga	TeleA01.ALP53512.1	A0A0S2TEE3	Tel_10360	bLHR-HTH	cellular organisms; Bacteria; Proteobacteria; Gammaproteobacteria; Chromatiales; Chromatiaceae; Candidatus Tenderia; Candidatus Tenderia electrophaga;
Xanthomonas axonopodis 306	XaxoA01.LHR1	Q8PJT0	XAC2450	bLHR-HTH	cellular organisms; Bacteria; Proteobacteria; Gammaproteobacteria; Xanthomonadales; Xanthomonadaceae; Xanthomonas; Xanthomonas citri group; Xanthomonas citri; Xanthomonas citri pv. citri; Xanthomonas citri pv. citri str. 306;
Pseudomonas oryzihabitans USDA-ARS-USMARC-56511	PoryA01.ALZ85184.1	A0A0U4VPL7	APT59_13635	bLHR-HTH	cellular organisms; Bacteria; Proteobacteria; Gammaproteobacteria; Pseudomonadales; Pseudomonadaceae; Pseudomonas; Pseudomonas putida group; Pseudomonas oryzihabitans;
Methylosinus trichosporium OB3b	MtriA01.ATQ70471.1	A0A2D2D621	CQW49_17875	bLHR-HTH	cellular organisms; Bacteria; Proteobacteria; Alphaproteobacteria; Rhizobiales; Methylocystaceae; Methylosinus; Methylosinus trichosporium; Methylosinus trichosporium OB3b;
Steroidobacter denitrificans DSM 18526	StdeA01.AMN48258.1	A0A127FEG4	ACG33_14355	bLHR-HTH	cellular organisms; Bacteria; Proteobacteria; Gammaproteobacteria; Nevskiales; Steroidobacteraceae; Steroidobacter; Steroidobacter denitrificans;
Gemmatirosa kalamazoonesis KBS708	GkalA01.AHG88940.1	W0RF27	J421_1403	bLHR-HTH	cellular organisms; Bacteria; FCB group; Gemmatimonadetes; Gemmatimonadetes; Gemmatimonadales; Gemmatimonadaceae; Gemmatirosa; Gemmatirosa kalamazoonesis;
Sediminispirochaeta smaragdinae DSM 11293	SsmaA01.ADK82075.1	E1R3V4	Spirs_2973	bLHR-HTH	cellular organisms; Bacteria; Spirochaetes; Spirochaetia; Spirochaetales; Spirochaetaceae; Sediminispirochaeta; Sediminispirochaeta smaragdinae; Sediminispirochaeta smaragdinae DSM 11293;
Geobacter bemidjiensis Bem	GbemA01.ACH38595.1	B5E8L0	Gbem_1577	bLHR-HTH	cellular organisms; Bacteria; Proteobacteria; delta/epsilon subdivisions; Deltaproteobacteria; Desulfuromonadales; Geobacteraceae; Geobacter; Geobacter bemidjiensis; Geobacter bemidjiensis Bem;
Desulfotomaculum acetoxidans DSM 771	DaceA01.ACV63406.1	C8W110	Dtox_2613	bLHR-HTH	cellular organisms; Bacteria; Terrabacteria group; Firmicutes; Clostridia; Clostridiales; Peptococcaceae; Desulfofarcimen; Desulfofarcimen acetoxidans; Desulfofarcimen acetoxidans DSM 771;
Desulfovibrio magneticus RS-1	DmagA01.LHR	C4XRI6	DMR_20400	bLHR-HTH	cellular organisms; Bacteria; Proteobacteria; delta/epsilon subdivisions; Deltaproteobacteria; Desulfovibrionales; Desulfovibrionaceae; Desulfovibrio; Desulfovibrio magneticus; Desulfovibrio magneticus RS-1;
Oleiphilus messinensis ME102	OmesA01.ARU59403.1	A0A1Y0IIZ0	OLMES_5423	bLHR-HTH	cellular organisms; Bacteria; Proteobacteria; Gammaproteobacteria; Oceanospirillales; Oleiphilaceae; Oleiphilus; Oleiphilus messinensis;
Hahella chejuensis KCTC 2396	HcheA01.LHR	Q2SEQ3	HCH_04162	bLHR-HTH	cellular organisms; Bacteria; Proteobacteria; Gammaproteobacteria; Oceanospirillales; Hahellaceae; Hahella; Hahella chejuensis; Hahella chejuensis KCTC 2396;
Paenibacillus beijingensis DSM 24997	PbeiA01.AJY74637.1	A0A0D5NI55	VN24_08690	bLHR-HTH	cellular organisms; Bacteria; Terrabacteria group; Firmicutes; Bacilli; Bacillales; Paenibacillaceae; Paenibacillus; Paenibacillus beijingensis;
Thermobacillus composti KWC4	TcomA01.AGA59597.1	L0EIF1	Theco_3569	bLHR-HTH	cellular organisms; Bacteria; Terrabacteria group; Firmicutes; Bacilli; Bacillales; Paenibacillaceae; Thermobacillus; Thermobacillus composti; Thermobacillus composti KWC4;
Paenibacillus sp. JDR-2	PaspA01.ACT01371.1	C6CYT0	Pjdr2_2718	bLHR-HTH	cellular organisms; Bacteria; Terrabacteria group; Firmicutes; Bacilli; Bacillales; Paenibacillaceae; Paenibacillus; unclassified Paenibacillus; Paenibacillus sp. JDR-2;
Limnochorda pilosa HC45	LpilA01.BAS26627.1	A0A0K2SHW1	LIP_0770	bLHR-HTH	cellular organisms; Bacteria; Terrabacteria group; Firmicutes; Limnochordia; Limnochordales; Limnochordaceae; Limnochorda; Limnochorda pilosa;
Symbiobacterium thermophilum IAM14863	SythA01.BAD39871.1	Q67R22	STH886	bLHR-HTH	cellular organisms; Bacteria; Terrabacteria group; Firmicutes; Clostridia; Clostridiales; Symbiobacteriaceae; Symbiobacterium; Symbiobacterium thermophilum; Symbiobacterium thermophilum IAM 14863;
Paludisphaera borealis PX4	PaboA01.RECQ_2	A0A1U7CN64	BSF38_01835	bLHR-HTH	cellular organisms; Bacteria; PVC group; Planctomycetes; Planctomycetia; Isosphaerales; Isosphaeraceae; Paludisphaera; Paludisphaera borealis;
Singulisphaera acidiphila DSM 18658	SiacA01.AGA25788.1	L0DAC7	Sinac_1405	bLHR-HTH	cellular organisms; Bacteria; PVC group; Planctomycetes; Planctomycetia; Isosphaerales; Isosphaeraceae; Singulisphaera; Singulisphaera acidiphila; Singulisphaera acidiphila DSM 18658;
Isosphaera pallida ATCC 43644	IpalA01.ADV63407.1	E8R1I9	Isop_2841	bLHR-HTH	cellular organisms; Bacteria; PVC group; Planctomycetes; Planctomycetia; Isosphaerales; Isosphaeraceae; Isosphaera; Isosphaera pallida; Isosphaera pallida ATCC 43644;
Ilumatobacter coccineus YM16-304	IcocA01.BAN01263.1	M4ZX70	YM304_09490	bLHR-HTH	cellular organisms; Bacteria; Terrabacteria group; Actinobacteria; Acidimicrobiia; Acidimicrobiales; Ilumatobacteraceae; Ilumatobacter; Ilumatobacter coccineus; Ilumatobacter coccineus YM16-304;
Conexibacter woesei DSM 14684	CwoeA01.ADB54193.1	D3F2R2	Cwoe_5792	bLHR-HTH	cellular organisms; Bacteria; Terrabacteria group; Actinobacteria; Thermoleophilia; Solirubrobacterales; Conexibacteraceae; Conexibacter; Conexibacter woesei; Conexibacter woesei DSM 14684;
Labilithrix luteola DSM 27648	LlutA01.AKV01085.1	A0A0K1Q6P7	AKJ09_07748	bLHR-HTH	cellular organisms; Bacteria; Proteobacteria; delta/epsilon subdivisions; Deltaproteobacteria; Myxococcales; Sorangiineae; Labilitrichaceae; Labilithrix; Labilithrix luteola;
Fuerstia marisgermanicae NH11	FmarA01.RECQ_2	A0A1P8WJF1	Fuma_03781	bLHR-HTH	cellular organisms; Bacteria; PVC group; Planctomycetes; Planctomycetia; Planctomycetales; Planctomycetaceae; Fuerstia; Fuerstia marisgermanicae;
Minicystis rosea DSM 24000	MiroA01.APR87780.1	A0A1L6M159	A7982_13129	bLHR-HTH	cellular organisms; Bacteria; Proteobacteria; delta/epsilon subdivisions; Deltaproteobacteria; Myxococcales; Sorangiineae; Sorangiineae incertae sedis; Minicystis; Minicystis rosea;
Sorangium cellulosum So ce 56	ScelA01.LHR2	A9EQE6	sce3970	bLHR-HTH	cellular organisms; Bacteria; Proteobacteria; delta/epsilon subdivisions; Deltaproteobacteria; Myxococcales; Sorangiineae; Polyangiaceae; Sorangium; Sorangium cellulosum; Sorangium cellulosum So ce56;
Terriglobus saanensis SP1PR4	TsaaA01.ADV81494.1	E8V5G0	AciPR4_0660	bLHR-HTH	cellular organisms; Bacteria; Acidobacteria; Acidobacteriia; Acidobacteriales; Acidobacteriaceae; Terriglobus; Terriglobus saanensis; Terriglobus saanensis SP1PR4;
Acidobacterium capsulatum ATCC 51196	AcapA01.ACO33650.1	C1F7I8	ACP_1717	bLHR-HTH	cellular organisms; Bacteria; Acidobacteria; Acidobacteriia; Acidobacteriales; Acidobacteriaceae; Acidobacterium; Acidobacterium capsulatum; Acidobacterium capsulatum ATCC 51196;
Candidatus Koribacter versatilis Ellin345	AbacA01.ABF39389.1	Q1IUR1	Acid345_0384	bLHR-HTH	cellular organisms; Bacteria; Acidobacteria; Acidobacteriia; Acidobacteriales; Acidobacteriaceae; Candidatus Koribacter; Candidatus Koribacter versatilis; Candidatus Koribacter versatilis Ellin345;
Candidatus Solibacter usitatus Ellin6076	SusiA01.ABJ83831.1	Q023K9	Acid_2845	bLHR-HTH	cellular organisms; Bacteria; Acidobacteria; Acidobacteriia; Bryobacterales; Solibacteraceae; Candidatus Solibacter; Candidatus Solibacter usitatus; Candidatus Solibacter usitatus Ellin6076;
Anaeromyxobacter dehalogenans 2CP-C	AdehA01.ABC81862.1	Q2IJM9	Adeh_2092	bLHR-HTH	cellular organisms; Bacteria; Proteobacteria; delta/epsilon subdivisions; Deltaproteobacteria; Myxococcales; Cystobacterineae; Anaeromyxobacteraceae; Anaeromyxobacter; Anaeromyxobacter dehalogenans; Anaeromyxobacter dehalogenans 2CP-C;
Luteitalea pratensis DSM 100886; HEG_-6_39	LpraA01.AMY12348.1	A0A143PVX2	LuPra_05621	bLHR-HTH	cellular organisms; Bacteria; Acidobacteria; Vicinamibacteria; Vicinamibacteraceae; Luteitalea; Luteitalea pratensis;
Haliangium ochraceum DSM 14365	HochA01.ACY17175.1	D0LRE7	Hoch_4684	bLHR-HTH	cellular organisms; Bacteria; Proteobacteria; delta/epsilon subdivisions; Deltaproteobacteria; Myxococcales; Nannocystineae; Kofleriaceae; Haliangium; Haliangium ochraceum; Haliangium ochraceum DSM 14365;
Candidatus Thiodictyon syntrophicum Cad16T	TsynA01.AUB83235.1	A0A2K8UCH5	THSYN_21345	bLHR-HTH	cellular organisms; Bacteria; Proteobacteria; Gammaproteobacteria; Chromatiales; Chromatiaceae; Thiodictyon; Candidatus Thiodictyon syntrophicum;
Thioalkalivibrio versutus D301	TverA01.AKJ94215.1	A0A0G3FZ34	TVD_01980	bLHR-HTH	cellular organisms; Bacteria; Proteobacteria; Gammaproteobacteria; Chromatiales; Ectothiorhodospiraceae; Thioalkalivibrio; Thioalkalivibrio versutus;
Thioflavicoccus mobilis 8321	ThmoA01.AGA90372.1	L0GX14	Thimo_1592	bLHR-HTH	cellular organisms; Bacteria; Proteobacteria; Gammaproteobacteria; Chromatiales; Chromatiaceae; Thioflavicoccus; Thioflavicoccus mobilis; Thioflavicoccus mobilis 8321;
Thioalkalivibrio sulfidiphilus HL-EbGR7	ThisA01.ACL71255.1	B8GTJ5	Tgr7_0156	bLHR-HTH	cellular organisms; Bacteria; Proteobacteria; Gammaproteobacteria; Chromatiales; Ectothiorhodospiraceae; Thioalkalivibrio; Thioalkalivibrio sulfidiphilus; Thioalkalivibrio sulfidiphilus HL-EbGr7;
Corynebacterium sphenisci DSM 44792	CsphA01.APT90538.1	A0A1L7CXJ9	CSPHI_05250	bLHR-HTH	cellular organisms; Bacteria; Terrabacteria group; Actinobacteria; Actinobacteria; Corynebacteriales; Corynebacteriaceae; Corynebacterium; Corynebacterium sphenisci; Corynebacterium sphenisci DSM 44792;
Dermatophilus congolensis NCTC13039	DconA01.SNV22280.1	A0A239VKD6	SAMEA4475696_01470	bLHR-HTH	cellular organisms; Bacteria; Terrabacteria group; Actinobacteria; Actinobacteria; Micrococcales; Dermatophilaceae; Dermatophilus; Dermatophilus congolensis;
Corynebacterium argentoratense DSM 44202	CargA01.AGU14700.1	U3GTB9	CARG_02730	bLHR-HTH	cellular organisms; Bacteria; Terrabacteria group; Actinobacteria; Actinobacteria; Corynebacteriales; Corynebacteriaceae; Corynebacterium; Corynebacterium argentoratense; Corynebacterium argentoratense DSM 44202;
Corynebacterium mustelae DSM 45274	CmusA01.AKK05306.1	A0A0G3GVU9	CMUST_04840	bLHR-HTH	cellular organisms; Bacteria; Terrabacteria group; Actinobacteria; Actinobacteria; Corynebacteriales; Corynebacteriaceae; Corynebacterium; Corynebacterium mustelae;
Corynebacterium kutscheri DSM 20755	CkutA01.AKE41862.1	A0A0F6R0R4	UL82_08525	bLHR-HTH	cellular organisms; Bacteria; Terrabacteria group; Actinobacteria; Actinobacteria; Corynebacteriales; Corynebacteriaceae; Corynebacterium; Corynebacterium kutscheri;
Corynebacterium glaucum DSM 30827	CoglA01.AQQ14704.1	A0A1Q2HV28	CGLAU_03635	bLHR-HTH	cellular organisms; Bacteria; Terrabacteria group; Actinobacteria; Actinobacteria; Corynebacteriales; Corynebacteriaceae; Corynebacterium; Corynebacterium glaucum;
Corynebacterium diphtheriae NCTC 13129	CdipA01.CAE49343.1	Q6NIF0	DIP0827	bLHR-HTH	cellular organisms; Bacteria; Terrabacteria group; Actinobacteria; Actinobacteria; Corynebacteriales; Corynebacteriaceae; Corynebacterium; Corynebacterium diphtheriae; Corynebacterium diphtheriae NCTC 13129;
Acidipropionibacterium acidipropionici ATCC 4875	PaciA01.AFV89569.1	K7RNJ7	PACID_17650	bLHR-HTH	cellular organisms; Bacteria; Terrabacteria group; Actinobacteria; Actinobacteria; Propionibacteriales; Propionibacteriaceae; Acidipropionibacterium; Acidipropionibacterium acidipropionici; Acidipropionibacterium acidipropionici ATCC 4875;
Pseudopropionibacterium propionicum F0230a	PrprA01.AFN45924.1	I6X2R9	HMPREF9154_1876	bLHR-HTH	cellular organisms; Bacteria; Terrabacteria group; Actinobacteria; Actinobacteria; Propionibacteriales; Propionibacteriaceae; Arachnia; Pseudopropionibacterium propionicum; Pseudopropionibacterium propionicum F0230a;
Tessaracoccus flavescens SST-39T	TeflA01.AQP51779.1	A0A1Q2D057	BW733_14055	bLHR-HTH	cellular organisms; Bacteria; Terrabacteria group; Actinobacteria; Actinobacteria; Propionibacteriales; Propionibacteriaceae; Tessaracoccus; Tessaracoccus flavescens;
Corynebacterium terpenotabidum Y-11	CterA01.AGP30241.1	S4XCB7	A606_02940	bLHR-HTH	cellular organisms; Bacteria; Terrabacteria group; Actinobacteria; Actinobacteria; Corynebacteriales; Corynebacteriaceae; Corynebacterium; Corynebacterium terpenotabidum; Corynebacterium terpenotabidum Y-11;
Corynebacterium resistens DSM 45100	CresA01.AEI08724.1	F8DXH9	CRES_0361	bLHR-HTH	cellular organisms; Bacteria; Terrabacteria group; Actinobacteria; Actinobacteria; Corynebacteriales; Corynebacteriaceae; Corynebacterium; Corynebacterium resistens; Corynebacterium resistens DSM 45100;
Corynebacterium urealyticum DSM 7109	CureA01.CAQ05478.1	B1VI94	cu1518	bLHR-HTH	cellular organisms; Bacteria; Terrabacteria group; Actinobacteria; Actinobacteria; Corynebacteriales; Corynebacteriaceae; Corynebacterium; Corynebacterium urealyticum; Corynebacterium urealyticum DSM 7109;
Corynebacterium falsenii BL 8171	CfalA01.AHI02643.1	W5WP95	CFAL_02700	bLHR-HTH	cellular organisms; Bacteria; Terrabacteria group; Actinobacteria; Actinobacteria; Corynebacteriales; Corynebacteriaceae; Corynebacterium; Corynebacterium falsenii; Corynebacterium falsenii DSM 44353;
Dietzia timorensis ID05-A0528	DtimA01.ANI93082.1	A0A173LQL9	BJL86_2318	bLHR-HTH	cellular organisms; Bacteria; Terrabacteria group; Actinobacteria; Actinobacteria; Corynebacteriales; Dietziaceae; Dietzia; Dietzia timorensis;
Shigella boydii Sb227	SboyA01.LHR	Q321A8	SBO_1482	bLHR-HTH	cellular organisms; Bacteria; Proteobacteria; Gammaproteobacteria; Enterobacterales; Enterobacteriaceae; Shigella; Shigella boydii; Shigella boydii Sb227;
Luteimonas sp. 100111	LuspA01.ATD67532.1	A0A290XEG1	CNR27_08865	bLHR-HTH	cellular organisms; Bacteria; Proteobacteria; Gammaproteobacteria; Xanthomonadales; Xanthomonadaceae; Luteimonas; Luteimonas chenhongjianii;
Alicycliphilus denitrificans BC	AdenA01.ADU98882.1	E8U278	Alide_1118	bLHR-HTH	cellular organisms; Bacteria; Proteobacteria; Betaproteobacteria; Burkholderiales; Comamonadaceae; Alicycliphilus; Alicycliphilus denitrificans; Alicycliphilus denitrificans BC;
Stenotrophomonas rhizophila QL-P4	SrhiA01.AOA72532.1	A0A1B2N4V6	BAY15_2098	bLHR-HTH	cellular organisms; Bacteria; Proteobacteria; Gammaproteobacteria; Xanthomonadales; Xanthomonadaceae; Stenotrophomonas; Stenotrophomonas rhizophila;
Pantoea sp. At-9b	PansA01.ADU69186.1	E6W8D4	Pat9b_1870	bLHR-HTH	cellular organisms; Bacteria; Proteobacteria; Gammaproteobacteria; Enterobacterales; Erwiniaceae; Pantoea; unclassified Pantoea; Pantoea sp. At-9b;
Pectobacterium atrosepticum SCRI1043	EcarA01.LHR	Q6D6U1	ECA1589	bLHR-HTH	cellular organisms; Bacteria; Proteobacteria; Gammaproteobacteria; Enterobacterales; Pectobacteriaceae; Pectobacterium; Pectobacterium atrosepticum; Pectobacterium atrosepticum SCRI1043;
Sodalis praecaptivus HS1	SpraA01.AHF77290.1	W0HYJ7	Sant_2245	bLHR-HTH	cellular organisms; Bacteria; Proteobacteria; Gammaproteobacteria; Enterobacterales; Pectobacteriaceae; Sodalis; Sodalis praecaptivus;
Brachybacterium faecium DSM 4810	BfaeA01.ACU85772.1	C7MDW5	Bfae_19580	bLHR-HTH	cellular organisms; Bacteria; Terrabacteria group; Actinobacteria; Actinobacteria; Micrococcales; Dermabacteraceae; Brachybacterium; Brachybacterium faecium; Brachybacterium faecium DSM 4810;
Gordonia phthalatica QH-11	GphtA01.ALG84245.1	A0A0N9N242	ACH46_06655	bLHR-HTH	cellular organisms; Bacteria; Terrabacteria group; Actinobacteria; Actinobacteria; Corynebacteriales; Gordoniaceae; Gordonia; Gordonia phthalatica;
Arthrobacter arilaitensis RE117	AariA01.CBT74657.1	E1VSQ4	AARI_04230	bLHR-HTH	cellular organisms; Bacteria; Terrabacteria group; Actinobacteria; Actinobacteria; Micrococcales; Micrococcaceae; Glutamicibacter; Glutamicibacter arilaitensis;
Segniliparus rotundus DSM 44985	SrotA01.ADG98871.1	D6ZBB9	Srot_2427	bLHR-HTH	cellular organisms; Bacteria; Terrabacteria group; Actinobacteria; Actinobacteria; Corynebacteriales; Segniliparaceae; Segniliparus; Segniliparus rotundus; Segniliparus rotundus DSM 44985;
Rothia mucilaginosa DY-18	RmucA01.BAI65586.1	D2NPL8	RMDY18_17540	bLHR-HTH	cellular organisms; Bacteria; Terrabacteria group; Actinobacteria; Actinobacteria; Micrococcales; Micrococcaceae; Rothia; Rothia mucilaginosa; Rothia mucilaginosa DY-18;
Rothia dentocariosa ATCC 17931	RodeA01.ADP40696.1	E3H4R3	HMPREF0733_11239	bLHR-HTH	cellular organisms; Bacteria; Terrabacteria group; Actinobacteria; Actinobacteria; Micrococcales; Micrococcaceae; Rothia; Rothia dentocariosa; Rothia dentocariosa ATCC 17931;
Actinomyces oris T14V	AcorA01.AME00227.1	A0A0X8K493	AXE84_06110	bLHR-HTH	cellular organisms; Bacteria; Terrabacteria group; Actinobacteria; Actinobacteria; Actinomycetales; Actinomycetaceae; Actinomyces; Actinomyces oris;
Eggerthella lenta DSM 2243	ElenA01.ACV56103.1	C8WJH4	Elen_2140	bLHR-HTH	cellular organisms; Bacteria; Terrabacteria group; Actinobacteria; Coriobacteriia; Eggerthellales; Eggerthellaceae; Eggerthella; Eggerthella lenta; Eggerthella lenta DSM 2243;
Adlercreutzia equolifaciens DSM 19450	AequA01.BAN76461.1	S6C497	AEQU_0492	bLHR-HTH	cellular organisms; Bacteria; Terrabacteria group; Actinobacteria; Coriobacteriia; Eggerthellales; Eggerthellaceae; Adlercreutzia; Adlercreutzia equolifaciens; Adlercreutzia equolifaciens DSM 19450;
Bifidobacterium asteroides PRL2011	BastA01.AFU71229.1	K4ILH0	BAST_0641	bLHR-HTH	cellular organisms; Bacteria; Terrabacteria group; Actinobacteria; Actinobacteria; Bifidobacteriales; Bifidobacteriaceae; Bifidobacterium; Bifidobacterium asteroides; Bifidobacterium asteroides PRL2011;
Bifidobacterium animalis AD011	BaniA01.LHR	B8DTB1	BLA_0950	bLHR-HTH	cellular organisms; Bacteria; Terrabacteria group; Actinobacteria; Actinobacteria; Bifidobacteriales; Bifidobacteriaceae; Bifidobacterium; Bifidobacterium animalis; Bifidobacterium animalis subsp. lactis; Bifidobacterium animalis subsp. lactis AD011;
Bifidobacterium choerinum FMB-1	BchoA01.ATU20948.1	A0A2D3D750	BcFMB_08490	bLHR-HTH	cellular organisms; Bacteria; Terrabacteria group; Actinobacteria; Actinobacteria; Bifidobacteriales; Bifidobacteriaceae; Bifidobacterium; Bifidobacterium choerinum;
Bifidobacterium angulatum JCM 7096	BangA01.BAQ96260.1		BBAG_0638	bLHR-HTH	cellular organisms; Bacteria; Terrabacteria group; Actinobacteria; Actinobacteria; Bifidobacteriales; Bifidobacteriaceae; Bifidobacterium; Bifidobacterium angulatum; Bifidobacterium angulatum DSM 20098 = JCM 7096;
Bifidobacterium adolescentis ATCC 15703	BadoA01.LHR	A1A256	BAD_1008	bLHR-HTH	cellular organisms; Bacteria; Terrabacteria group; Actinobacteria; Actinobacteria; Bifidobacteriales; Bifidobacteriaceae; Bifidobacterium; Bifidobacterium adolescentis; Bifidobacterium adolescentis ATCC 15703;
Bifidobacterium kashiwanohense PV20-2	BkasA01.AIZ14822.1	A0A0A7I3C7	AH68_06985	bLHR-HTH	cellular organisms; Bacteria; Terrabacteria group; Actinobacteria; Actinobacteria; Bifidobacteriales; Bifidobacteriaceae; Bifidobacterium; Bifidobacterium catenulatum; Bifidobacterium catenulatum subsp. kashiwanohense; Bifidobacterium kashiwanohense PV20-2;
Bifidobacterium bifidum PRL2010	BbifA01.LHR	E4NXN3	BBPR_1253	bLHR-HTH	cellular organisms; Bacteria; Terrabacteria group; Actinobacteria; Actinobacteria; Bifidobacteriales; Bifidobacteriaceae; Bifidobacterium; Bifidobacterium bifidum; Bifidobacterium bifidum PRL2010;
Cryobacterium arcticum PAMC 27867	CarcA01.ANP72131.1	A0A1B1BHQ7	PA27867_1165	bLHR-HTH	cellular organisms; Bacteria; Terrabacteria group; Actinobacteria; Actinobacteria; Micrococcales; Microbacteriaceae; Cryobacterium; Cryobacterium arcticum;
Cnuibacter physcomitrellae XA(T)	CnphA01.ARJ04568.1	A0A1X9LJT0	B5808_04525	bLHR-HTH	cellular organisms; Bacteria; Terrabacteria group; Actinobacteria; Actinobacteria; Micrococcales; Microbacteriaceae; Cnuibacter; Cnuibacter physcomitrellae;
Clavibacter michiganensis NCPPB 382	CmicA01.CAN02731.1	A5CUE4	CMM_2648	bLHR-HTH	cellular organisms; Bacteria; Terrabacteria group; Actinobacteria; Actinobacteria; Micrococcales; Microbacteriaceae; Clavibacter; Clavibacter michiganensis; Clavibacter michiganensis subsp. michiganensis; Clavibacter michiganensis subsp. michiganensis NCPPB 382;
Microlunatus phosphovorus NM-1	MphoA01.BAK35127.1	F5XDV4	MLP_21130	bLHR-HTH	cellular organisms; Bacteria; Terrabacteria group; Actinobacteria; Actinobacteria; Propionibacteriales; Propionibacteriaceae; Microlunatus; Microlunatus phosphovorus; Microlunatus phosphovorus NM-1;
Propionibacterium freudenreichii CIRM-B1AI	PfreA01.CBL56833.1	D7GE72	PFREUD_13150	bLHR-HTH	cellular organisms; Bacteria; Terrabacteria group; Actinobacteria; Actinobacteria; Propionibacteriales; Propionibacteriaceae; Propionibacterium; Propionibacterium freudenreichii; Propionibacterium freudenreichii subsp. shermanii; Propionibacterium freudenreichii subsp. shermanii CIRM-BIA1;
Kribbella flavida DSM 17836	KflaA01.ADB32063.1	D2Q1S4	Kfla_2998	bLHR-HTH	cellular organisms; Bacteria; Terrabacteria group; Actinobacteria; Actinobacteria; Propionibacteriales; Nocardioidaceae; Kribbella; Kribbella flavida; Kribbella flavida DSM 17836;
Kineococcus radiotolerans SRS30216	KradA01.ABS02977.1	A6W838	Krad_1489	bLHR-HTH	cellular organisms; Bacteria; Terrabacteria group; Actinobacteria; Actinobacteria; Kineosporiales; Kineosporiaceae; Kineococcus; Kineococcus radiotolerans; Kineococcus radiotolerans SRS30216 = ATCC BAA-149;
Janibacter indicus YFY001	JindA01.APH01830.1	A0A1L3MHJ8	ASJ30_10080	bLHR-HTH	cellular organisms; Bacteria; Terrabacteria group; Actinobacteria; Actinobacteria; Micrococcales; Intrasporangiaceae; Janibacter; Janibacter indicus;
Intrasporangium calvum DSM 43043	IcalA01.ADU49904.1	E6SF90	Intca_3424	bLHR-HTH	cellular organisms; Bacteria; Terrabacteria group; Actinobacteria; Actinobacteria; Micrococcales; Intrasporangiaceae; Intrasporangium; Intrasporangium calvum; Intrasporangium calvum DSM 43043;
Stackebrandtia nassauensis DSM 44728	SnasA01.ADD43842.1	D3Q2A9	Snas_4192	bLHR-HTH	cellular organisms; Bacteria; Terrabacteria group; Actinobacteria; Actinobacteria; Glycomycetales; Glycomycetaceae; Stackebrandtia; Stackebrandtia nassauensis; Stackebrandtia nassauensis DSM 44728;
Kytococcus sedentarius DSM 20547	KsedA01.ACV06785.1	C7NJ98	Ksed_17730	bLHR-HTH	cellular organisms; Bacteria; Terrabacteria group; Actinobacteria; Actinobacteria; Micrococcales; Dermacoccaceae; Kytococcus; Kytococcus sedentarius; Kytococcus sedentarius DSM 20547;
Serinicoccus sp. JLT9	SersA01.ANS80541.1	A0A1B1NGL2	SGUI_3145	bLHR-HTH	cellular organisms; Bacteria; Terrabacteria group; Actinobacteria; Actinobacteria; Micrococcales; Intrasporangiaceae; Serinicoccus; Serinicoccus hydrothermalis;
Nakamurella multipartita DSM 44233	NamuA01.ACV77227.1	C8X9F9	Namu_0816	bLHR-HTH	cellular organisms; Bacteria; Terrabacteria group; Actinobacteria; Actinobacteria; Nakamurellales; Nakamurellaceae; Nakamurella; Nakamurella multipartita; Nakamurella multipartita DSM 44233;
Nocardiopsis gilva YIM 90087	NgilA01.ASU86353.1	A0A223SE48	CDO52_20630	bLHR-HTH	cellular organisms; Bacteria; Terrabacteria group; Actinobacteria; Actinobacteria; Streptosporangiales; Nocardiopsaceae; Nocardiopsis; Nocardiopsis gilva; Nocardiopsis gilva YIM 90087;
Nocardiopsis alba ATCC BAA-2165	NalbA01.AFR10547.1	J7LIT3	B005_3559	bLHR-HTH	cellular organisms; Bacteria; Terrabacteria group; Actinobacteria; Actinobacteria; Streptosporangiales; Nocardiopsaceae; Nocardiopsis; Nocardiopsis alba; Nocardiopsis alba ATCC BAA-2165;
Acidothermus cellulolyticus 11B; ATCC 43068	AcelA01.ABK53268.1	A0LV08	Acel_1496	bLHR-HTH	cellular organisms; Bacteria; Terrabacteria group; Actinobacteria; Actinobacteria; Acidothermales; Acidothermaceae; Acidothermus; Acidothermus cellulolyticus; Acidothermus cellulolyticus 11B;
Jonesia denitrificans DSM 20603	JdenA01.ACV08695.1	C7R3F9	Jden_1039	bLHR-HTH	cellular organisms; Bacteria; Terrabacteria group; Actinobacteria; Actinobacteria; Micrococcales; Jonesiaceae; Jonesia; Jonesia denitrificans; Jonesia denitrificans DSM 20603;
Cellulosimicrobium sp. TH-20	CespA01.ARK05797.1	A0A1W6DSS0	B8281_14745	bLHR-HTH	cellular organisms; Bacteria; Terrabacteria group; Actinobacteria; Actinobacteria; Micrococcales; Promicromonosporaceae; Cellulosimicrobium; unclassified Cellulosimicrobium; Cellulosimicrobium sp. TH-20;
Cellulomonas fimi ATCC 484	CfimA01.AEE45698.1	F4H764	Celf_1564	bLHR-HTH	cellular organisms; Bacteria; Terrabacteria group; Actinobacteria; Actinobacteria; Micrococcales; Cellulomonadaceae; Cellulomonas; Cellulomonas fimi; Cellulomonas fimi ATCC 484;
Beutenbergia cavernae DSM 12333	BcavA01.ACQ80703.1	C5BWN7	Bcav_2453	bLHR-HTH	cellular organisms; Bacteria; Terrabacteria group; Actinobacteria; Actinobacteria; Micrococcales; Beutenbergiaceae; Beutenbergia; Beutenbergia cavernae; Beutenbergia cavernae DSM 12333;
Sanguibacter keddieii DSM 10542	SkedA01.ACZ22237.1	D1BJ43	Sked_23220	bLHR-HTH	cellular organisms; Bacteria; Terrabacteria group; Actinobacteria; Actinobacteria; Micrococcales; Sanguibacteraceae; Sanguibacter; Sanguibacter keddieii; Sanguibacter keddieii DSM 10542;
Granulibacter bethesdensis CGDNIH1	GbetA01.ABI61801.1	Q0BTQ2	GbCGDNIH1_0903	bLHR	cellular organisms; Bacteria; Proteobacteria; Alphaproteobacteria; Rhodospirillales; Acetobacteraceae; Granulibacter; Granulibacter bethesdensis; Granulibacter bethesdensis CGDNIH1;
Neoasaia chiangmaiensis NBRC 101099	NchiA01.AQS88954.1	A0A1U9KSX9	A0U93_14665	bLHR	cellular organisms; Bacteria; Proteobacteria; Alphaproteobacteria; Rhodospirillales; Acetobacteraceae; Neoasaia; Neoasaia chiangmaiensis;
Kozakia baliensis DSM 14400	KbalA01.AOX16755.1	A0A1D8USW8	A0U89_05995	bLHR	cellular organisms; Bacteria; Proteobacteria; Alphaproteobacteria; Rhodospirillales; Acetobacteraceae; Kozakia; Kozakia baliensis;
Paracoccus denitrificans PD1222	PdenA01.ABL68527.1	A1AZ33	Pden_0413	bLHR	cellular organisms; Bacteria; Proteobacteria; Alphaproteobacteria; Rhodobacterales; Rhodobacteraceae; Paracoccus; Paracoccus denitrificans; Paracoccus denitrificans PD1222;
Asticcacaulis excentricus CB 48	AexcA01.ADU13031.1	E8RP61	Astex_1361	bLHR	cellular organisms; Bacteria; Proteobacteria; Alphaproteobacteria; Caulobacterales; Caulobacteraceae; Asticcacaulis; Asticcacaulis excentricus; Asticcacaulis excentricus CB 48;
Glaciecola nitratireducens FR1064	GnitA01.LHR	G4QIL8	GNIT_3078	bLHR	cellular organisms; Bacteria; Proteobacteria; Gammaproteobacteria; Alteromonadales; Alteromonadaceae; Glaciecola; Glaciecola nitratireducens; Glaciecola nitratireducens FR1064;
Rhodomicrobium vannielii ATCC 17100	RvanA01.ADP71323.1	E3I222	Rvan_2098	bLHR	cellular organisms; Bacteria; Proteobacteria; Alphaproteobacteria; Rhizobiales; Hyphomicrobiaceae; Rhodomicrobium; Rhodomicrobium vannielii; Rhodomicrobium vannielii ATCC 17100;
Tistrella mobilis KA081020-065	TmobA01.AFK53901.1	I3TMB3	TMO_2063	bLHR	cellular organisms; Bacteria; Proteobacteria; Alphaproteobacteria; Rhodospirillales; Rhodospirillaceae; Tistrella; Tistrella mobilis; Tistrella mobilis KA081020-065;
Brevundimonas vesicularis FDAARGOS_289	BvesA01.ASE39030.1	A0A1Z3U799	CEP68_05700	bLHR	cellular organisms; Bacteria; Proteobacteria; Alphaproteobacteria; Caulobacterales; Caulobacteraceae; Brevundimonas; Brevundimonas vesicularis;
Hyphomonas neptunium ATCC 15444	HnepA01.ABI75806.1	Q0C4L0	HNE_0604	bLHR	cellular organisms; Bacteria; Proteobacteria; Alphaproteobacteria; Hyphomonadales; Hyphomonadaceae; Hyphomonas; Hyphomonas neptunium; Hyphomonas neptunium ATCC 15444;
Hyphomonadaceae bacterium UKL13-1	HbacA01.AMS28323.1	A0A142L7X7	AEM38_00490	bLHR	cellular organisms; Bacteria; Proteobacteria; Alphaproteobacteria; Hyphomonadales; Hyphomonadaceae; unclassified Hyphomonadaceae; Hyphomonadaceae bacterium UKL13-1;
Maricaulis maris MCS10	MamaA01.ABI64823.1	Q0ASB4	Mmar10_0530	bLHR	cellular organisms; Bacteria; Proteobacteria; Alphaproteobacteria; Maricaulales; Maricaulaceae; Maricaulis; Maricaulis maris; Maricaulis maris MCS10;
Parvibaculum lavamentivorans DS-1	PlavA01.ABS62076.1	A7HQ93	Plav_0453	bLHR	cellular organisms; Bacteria; Proteobacteria; Alphaproteobacteria; Rhizobiales; Rhodobiaceae; Parvibaculum; Parvibaculum lavamentivorans; Parvibaculum lavamentivorans DS-1;
Rhizobiales bacterium NRL2	RhbaA01.ANK83359.1	A0A192IQA1	TEF_08395	bLHR	cellular organisms; Bacteria; Proteobacteria; Alphaproteobacteria; Rhizobiales; unclassified Rhizobiales; Rhizobiales bacterium NRL2;
Parvularcula bermudensis HTCC2503	PberA01.ADM08520.1	E0TC87	PB2503_02207	bLHR	cellular organisms; Bacteria; Proteobacteria; Alphaproteobacteria; Parvularculales; Parvularculaceae; Parvularcula; Parvularcula bermudensis; Parvularcula bermudensis HTCC2503;
Pseudovibrio sp. FO-BEG1	PsvsA01.AEV36253.1	G8PUC8	PSE_1741	bLHR	cellular organisms; Bacteria; Proteobacteria; Alphaproteobacteria; Rhodobacterales; Rhodobacteraceae; Pseudovibrio; unclassified Pseudovibrio; Pseudovibrio sp. FO-BEG1;
Methyloceanibacter caenitepidi Gela4	McaeA01.BAQ16332.1	A0A0A8K1G9	GL4_0871	bLHR	cellular organisms; Bacteria; Proteobacteria; Alphaproteobacteria; Rhizobiales; Rhizobiales incertae sedis; Methyloceanibacter; Methyloceanibacter caenitepidi;
Xanthomonas fuscans 4834-R	XfusA01.CDF62614.1	U4M3C5	XFF4834R_chr31610	bLHR	cellular organisms; Bacteria; Proteobacteria; Gammaproteobacteria; Xanthomonadales; Xanthomonadaceae; Xanthomonas; Xanthomonas citri group; Xanthomonas citri; Xanthomonas citri pv. fuscans;
Luteibacter rhizovicinus LJ96T	LrhiA01.APG05300.1	A0A0G9HDT5	BJI69_16265	bLHR	cellular organisms; Bacteria; Proteobacteria; Gammaproteobacteria; Xanthomonadales; Rhodanobacteraceae; Luteibacter; Luteibacter rhizovicinus;
Spiribacter salinus M19-40	SaliA01.AGM41313.1	R4VP83	SPISAL_06095	bLHR	cellular organisms; Bacteria; Proteobacteria; Gammaproteobacteria; Chromatiales; Ectothiorhodospiraceae; Spiribacter; Spiribacter salinus; Spiribacter salinus M19-40;
Wenzhouxiangella marina KCTC 42284	WmarA01.AKS41387.1	A0A0K0XUT6	WM2015_1010	bLHR	cellular organisms; Bacteria; Proteobacteria; Gammaproteobacteria; Chromatiales; Wenzhouxiangellaceae; Wenzhouxiangella; Wenzhouxiangella marina;
Phycisphaera mikurensis NBRC 102666	PmikA01.BAM03239.1	I0IDA1	PSMK_10800	bLHR	cellular organisms; Bacteria; PVC group; Planctomycetes; Phycisphaerae; Phycisphaerales; Phycisphaeraceae; Phycisphaera; Phycisphaera mikurensis; Phycisphaera mikurensis NBRC 102666;
Rubinisphaera brasiliensis DSM 5305	PbraA01.ADY61209.1	F0SQ32	Plabr_3612	bLHR	cellular organisms; Bacteria; PVC group; Planctomycetes; Planctomycetia; Planctomycetales; Planctomycetaceae; Rubinisphaera; Rubinisphaera brasiliensis; Rubinisphaera brasiliensis DSM 5305;
Planctopirus limnophila DSM 3776	PlimA01.ADG68822.1	D5SS98	Plim_3000	bLHR	cellular organisms; Bacteria; PVC group; Planctomycetes; Planctomycetia; Planctomycetales; Planctomycetaceae; Planctopirus; Planctopirus limnophila; Planctopirus limnophila DSM 3776;
Planctomyces sp. SH-PL14	PcmyA01.AMV19785.1	A0A142WYP1	VT03_17945	bLHR	cellular organisms; Bacteria; PVC group; Planctomycetes; Planctomycetia; Planctomycetales; Planctomycetaceae; Planctomyces; unclassified Planctomyces; Planctomyces sp. SH-PL14;
Gemmatimonas aurantiaca T-27	GaurA01.BAH40444.1	C1AD67	GAU_3402	bLHR	cellular organisms; Bacteria; FCB group; Gemmatimonadetes; Gemmatimonadetes; Gemmatimonadales; Gemmatimonadaceae; Gemmatimonas; Gemmatimonas aurantiaca; Gemmatimonas aurantiaca T-27;
Roseiflexus castenholzii DSM 13941	RcasA01.ABU57128.1	A7NI28	Rcas_1024	bLHR	cellular organisms; Bacteria; Terrabacteria group; Chloroflexi; Chloroflexia; Chloroflexales; Roseiflexineae; Roseiflexaceae; Roseiflexus; Roseiflexus castenholzii; Roseiflexus castenholzii DSM 13941;
Fimbriimonas ginsengisoli Gsoil 348	FginA01.AIE87405.1	A0A068NX93	OP10G_4037	bLHR	cellular organisms; Bacteria; Terrabacteria group; Armatimonadetes; Fimbriimonadia; Fimbriimonadales; Fimbriimonadaceae; Fimbriimonas; Fimbriimonas ginsengisoli; Fimbriimonas ginsengisoli Gsoil 348;
Rhodopirellula baltica 1	PispA01.HELX	Q7UX43	RB1577	bLHR	cellular organisms; Bacteria; PVC group; Planctomycetes; Planctomycetia; Pirellulales; Pirellulaceae; Rhodopirellula; Rhodopirellula baltica; Rhodopirellula baltica SH 1;
Pseudomonas oryzihabitans USDA-ARS-USMARC-56511	PoryA01.ALZ84093.1	A0A0U4WPW2	APT59_07645	bLHR	cellular organisms; Bacteria; Proteobacteria; Gammaproteobacteria; Pseudomonadales; Pseudomonadaceae; Pseudomonas; Pseudomonas putida group; Pseudomonas oryzihabitans;
Paraburkholderia xenovorans LB400	BxenA02.ABE35176.1	Q13L63	Bxe_B0778	bLHR	cellular organisms; Bacteria; Proteobacteria; Betaproteobacteria; Burkholderiales; Burkholderiaceae; Paraburkholderia; Paraburkholderia xenovorans; Paraburkholderia xenovorans LB400;
Delftia acidovorans SPH-1	DaciA01.ABX35683.1	A9C247	Daci_3045	bLHR	cellular organisms; Bacteria; Proteobacteria; Betaproteobacteria; Burkholderiales; Comamonadaceae; Delftia; Delftia acidovorans; Delftia acidovorans SPH-1;
Hydrogenophaga sp. RAC07	HydsA01.AOF88111.1	A0A1B3M4W5	BSY239_609	bLHR	cellular organisms; Bacteria; Proteobacteria; Betaproteobacteria; Burkholderiales; Comamonadaceae; Hydrogenophaga; unclassified Hydrogenophaga; Hydrogenophaga sp. RAC07;
Rubrivivax gelatinosus IL144	RgelA01.BAL97123.1	I0HVT6	RGE_37840	bLHR	cellular organisms; Bacteria; Proteobacteria; Betaproteobacteria; Burkholderiales; Burkholderiales genera incertae sedis; Rubrivivax; Rubrivivax gelatinosus; Rubrivivax gelatinosus IL144;
Roseateles depolymerans KCTC 42856	RdepA01.ALV07206.1	A0A0U3D0T5	RD2015_2741	bLHR	cellular organisms; Bacteria; Proteobacteria; Betaproteobacteria; Burkholderiales; Burkholderiales genera incertae sedis; Roseateles; Roseateles depolymerans;
Pseudomonas poae RE*1-1-14	PpoaA01.AGE24744.1	M4JWE7	H045_03340	bLHR	cellular organisms; Bacteria; Proteobacteria; Gammaproteobacteria; Pseudomonadales; Pseudomonadaceae; Pseudomonas; Pseudomonas fluorescens group; Pseudomonas poae; Pseudomonas poae RE*1-1-14;
Herbaspirillum hiltneri N3	HhilA01.AKZ65540.1	A0A0K2BJG4	F506_20420	bLHR	cellular organisms; Bacteria; Proteobacteria; Betaproteobacteria; Burkholderiales; Oxalobacteraceae; Herbaspirillum; Herbaspirillum hiltneri; Herbaspirillum hiltneri N3;
Candidatus Protochlamydia amoebophila UWE25	PsymA01.CAF23673.1	Q6MCM6	PC_RS04575	bLHR	cellular organisms; Bacteria; PVC group; Chlamydiae; Chlamydiia; Parachlamydiales; Parachlamydiaceae; Candidatus Protochlamydia; Candidatus Protochlamydia amoebophila; Candidatus Protochlamydia amoebophila UWE25;
Synechococcus sp. WH 8102	SyspA01.CAE07837.1	Q7U6L6	SYNW1322	bLHR	cellular organisms; Bacteria; Terrabacteria group; Cyanobacteria/Melainabacteria group; Cyanobacteria; Synechococcales; Synechococcaceae; Synechococcus; unclassified Synechococcus; Synechococcus sp. WH 8102;
Cyanobium gracile PCC 6307	CgraA01.AFY27853.1	K9P4F6	Cyagr_0664	bLHR	cellular organisms; Bacteria; Terrabacteria group; Cyanobacteria/Melainabacteria group; Cyanobacteria; Synechococcales; Synechococcaceae; Cyanobium; Cyanobium gracile; Cyanobium gracile PCC 6307;
Flammeovirgaceae bacterium 311	FlbaA01.AHM59165.1	A0A0D3LAU7	D770_04490	bLHR	cellular organisms; Bacteria; FCB group; Bacteroidetes/Chlorobi group; Bacteroidetes; Cytophagia; Cytophagales; Flammeovirgaceae; unclassified Flammeovirgaceae; Flammeovirgaceae bacterium 311;
Solitalea canadensis DSM 3403	ScanA01.AFD06192.1	H8KQ24	Solca_1086	bLHR	cellular organisms; Bacteria; FCB group; Bacteroidetes/Chlorobi group; Bacteroidetes; Sphingobacteriia; Sphingobacteriales; Sphingobacteriaceae; Solitalea; Solitalea canadensis; Solitalea canadensis DSM 3403;
Dyadobacter fermentans DSM 18053	DferA01.ACT94543.1	C6VS22	Dfer_3332	bLHR	cellular organisms; Bacteria; FCB group; Bacteroidetes/Chlorobi group; Bacteroidetes; Cytophagia; Cytophagales; Cytophagaceae; Dyadobacter; Dyadobacter fermentans; Dyadobacter fermentans DSM 18053;
Marivirga tractuosa DSM 4126	MtraA01.ADR20773.1	E4TS22	Ftrac_0771	bLHR	cellular organisms; Bacteria; FCB group; Bacteroidetes/Chlorobi group; Bacteroidetes; Cytophagia; Cytophagales; Marivirgaceae; Marivirga; Marivirga tractuosa; Marivirga tractuosa DSM 4126;
Cyclobacterium amurskyense KCTC 12363	CamuA01.AKP53989.1	A0A0H4PIP8	CA2015_4658	bLHR	cellular organisms; Bacteria; FCB group; Bacteroidetes/Chlorobi group; Bacteroidetes; Cytophagia; Cytophagales; Cyclobacteriaceae; Cyclobacterium; Cyclobacterium amurskyense;
Belliella baltica DSM 15883	BbalA01.AFL85477.1	I3Z8A9	Belba_2947	bLHR	cellular organisms; Bacteria; FCB group; Bacteroidetes/Chlorobi group; Bacteroidetes; Cytophagia; Cytophagales; Cyclobacteriaceae; Belliella; Belliella baltica; Belliella baltica DSM 15883;
Algoriphagus sp. M8-2	AlgsA01.AMQ56657.1	A0A142ENF2	AO498_09510	bLHR	cellular organisms; Bacteria; FCB group; Bacteroidetes/Chlorobi group; Bacteroidetes; Cytophagia; Cytophagales; Cyclobacteriaceae; Algoriphagus; Algoriphagus sanaruensis;
Sphingobacterium sp. 21	SpspA01.ADZ77679.1	F4CD68	Sph21_1109	bLHR	cellular organisms; Bacteria; FCB group; Bacteroidetes/Chlorobi group; Bacteroidetes; Sphingobacteriia; Sphingobacteriales; Sphingobacteriaceae; Sphingobacterium; unclassified Sphingobacterium; Sphingobacterium sp. 21;
Cytophaga hutchinsonii ATCC 33406	ChutA01.LHR	Q11PA5	CHU_3525	bLHR	cellular organisms; Bacteria; FCB group; Bacteroidetes/Chlorobi group; Bacteroidetes; Cytophagia; Cytophagales; Cytophagaceae; Cytophaga; Cytophaga hutchinsonii; Cytophaga hutchinsonii ATCC 33406;
Cellulophaga baltica 18	CbalA01.AIZ41299.1	A0A0A7K7W3	M666_06760	bLHR	cellular organisms; Bacteria; FCB group; Bacteroidetes/Chlorobi group; Bacteroidetes; Flavobacteriia; Flavobacteriales; Flavobacteriaceae; Cellulophaga; Cellulophaga baltica; Cellulophaga baltica 18;
Owenweeksia hongkongensis DSM 17368	OhonA01.AEV33603.1	G8R8Z5	Oweho_2639	bLHR	cellular organisms; Bacteria; FCB group; Bacteroidetes/Chlorobi group; Bacteroidetes; Flavobacteriia; Flavobacteriales; Schleiferiaceae; Owenweeksia; Owenweeksia hongkongensis; Owenweeksia hongkongensis DSM 17368;
Niastella koreensis GR20-10	NkorA01.AEW01310.1	G8T9W6	Niako_5071	bLHR	cellular organisms; Bacteria; FCB group; Bacteroidetes/Chlorobi group; Bacteroidetes; Chitinophagia; Chitinophagales; Chitinophagaceae; Niastella; Niastella koreensis; Niastella koreensis GR20-10;
Flavisolibacter tropicus LCS9	FtroA01.ANE50598.1	A0A172TUF2	SY85_08870	bLHR	cellular organisms; Bacteria; FCB group; Bacteroidetes/Chlorobi group; Bacteroidetes; Chitinophagia; Chitinophagales; Chitinophagaceae; Flavisolibacter; Flavisolibacter tropicus;
Chitinophaga caeni 13	CcaeA01.ATL45786.1	A0A291QPC5	COR50_00660	bLHR	cellular organisms; Bacteria; FCB group; Bacteroidetes/Chlorobi group; Bacteroidetes; Chitinophagia; Chitinophagales; Chitinophagaceae; Chitinophaga; Chitinophaga caeni;
Chitinophaga pinensis DSM 2588	CpinA01.ACU64265.1	C7PQ27	Cpin_6864	bLHR	cellular organisms; Bacteria; FCB group; Bacteroidetes/Chlorobi group; Bacteroidetes; Chitinophagia; Chitinophagales; Chitinophagaceae; Chitinophaga; Chitinophaga pinensis; Chitinophaga pinensis DSM 2588;
Pedobacter ginsengisoli T01R-27	PegiA01.ATP55874.1	A0A2D1U2Z2	CPT03_05045	bLHR	cellular organisms; Bacteria; FCB group; Bacteroidetes/Chlorobi group; Bacteroidetes; Sphingobacteriia; Sphingobacteriales; Sphingobacteriaceae; Pedobacter; Pedobacter ginsengisoli;
Niabella ginsenosidivorans BS26	NginA01.ANH83937.1	A0A1A9I8E0	A8C56_13945	bLHR	cellular organisms; Bacteria; FCB group; Bacteroidetes/Chlorobi group; Bacteroidetes; Chitinophagia; Chitinophagales; Chitinophagaceae; Niabella; Niabella ginsenosidivorans;
Lacinutrix venerupis DOK2-8	LvenA01.APY00214.1	A0A1P8RNE4	BWR22_07770	bLHR	cellular organisms; Bacteria; FCB group; Bacteroidetes/Chlorobi group; Bacteroidetes; Flavobacteriia; Flavobacteriales; Flavobacteriaceae; Lacinutrix; Lacinutrix venerupis;
Leadbetterella byssophila DSM 17132	LbysA01.ADQ16484.1	E4RZE5	Lbys_0723	bLHR	cellular organisms; Bacteria; FCB group; Bacteroidetes/Chlorobi group; Bacteroidetes; Cytophagia; Cytophagales; Cytophagaceae; Leadbetterella; Leadbetterella byssophila; Leadbetterella byssophila DSM 17132;
Chryseobacterium sp. StRB126	ChrsA01.LHR	A0A077KHR3	CHSO_2563	bLHR	cellular organisms; Bacteria; FCB group; Bacteroidetes/Chlorobi group; Bacteroidetes; Flavobacteriia; Flavobacteriales; Weeksellaceae; Chryseobacterium group; Chryseobacterium; unclassified Chryseobacterium; Chryseobacterium sp. StRB126;
Opitutus terrae PB90-1	OterA01.ACB76427.1	B1ZZM6	Oter_3147		cellular organisms; Bacteria; PVC group; Verrucomicrobia; Opitutae; Opitutales; Opitutaceae; Opitutus; Opitutus terrae; Opitutus terrae PB90-1;
Paludisphaera borealis PX4	PaboA01.YFML	A0A1U7CPU3	BSF38_02422		cellular organisms; Bacteria; PVC group; Planctomycetes; Planctomycetia; Isosphaerales; Isosphaeraceae; Paludisphaera; Paludisphaera borealis;
Isosphaera pallida ATCC 43644	IpalA01.ADV61289.1	E8R183	Isop_0698		cellular organisms; Bacteria; PVC group; Planctomycetes; Planctomycetia; Isosphaerales; Isosphaeraceae; Isosphaera; Isosphaera pallida; Isosphaera pallida ATCC 43644;
Desulfomicrobium orale DSM 12838	DoraA01.AMD92717.1	A0A0X8JPS5	AXF15_06105	LHR-like	cellular organisms; Bacteria; Proteobacteria; delta/epsilon subdivisions; Deltaproteobacteria; Desulfovibrionales; Desulfomicrobiaceae; Desulfomicrobium; Desulfomicrobium orale; Desulfomicrobium orale DSM 12838;
Desulfobacula toluolica Tol2	DtolA01.CCK79838.1	K0NJ01	TOL2_C16770	LHR-like	cellular organisms; Bacteria; Proteobacteria; delta/epsilon subdivisions; Deltaproteobacteria; Desulfobacterales; Desulfobacteraceae; Desulfobacula; Desulfobacula toluolica; Desulfobacula toluolica Tol2;
Caldicellulosiruptor kronotskyensis 2002	CakrA01.ADQ45921.1	E4SCI7	Calkro_1050	LHR-like	cellular organisms; Bacteria; Terrabacteria group; Firmicutes; Clostridia; Thermoanaerobacterales; Thermoanaerobacterales Family III. Incertae Sedis; Caldicellulosiruptor; Caldicellulosiruptor kronotskyensis; Caldicellulosiruptor kronotskyensis 2002;
Kosmotoga olearia TBF 19.5.1	KoleA01.ACR79194.1	C5CE86	Kole_0471	LHR-like	cellular organisms; Bacteria; Thermotogae; Thermotogae; Kosmotogales; Kosmotogaceae; Kosmotoga; Kosmotoga olearia; Kosmotoga olearia TBF 19.5.1;
Mesotoga prima MesG1.Ag.4.2	MpriA01.AFK06221.1	I2F2R8	Theba_0495	LHR-like	cellular organisms; Bacteria; Thermotogae; Thermotogae; Kosmotogales; Kosmotogaceae; Mesotoga; Mesotoga prima; Mesotoga prima MesG1.Ag.4.2;
Virgibacillus halodenitrificans PDB-F2	VhalA01.APC47783.1	A0A1J0GZW9	BME96_06175	LHR-like	cellular organisms; Bacteria; Terrabacteria group; Firmicutes; Bacilli; Bacillales; Bacillaceae; Virgibacillus; Virgibacillus halodenitrificans;
Deinococcus gobiensis I-0	DgobA01.AFD26689.1	H8GUK6	DGo_CA2762	LHR-like	cellular organisms; Bacteria; Terrabacteria group; Deinococcus-Thermus; Deinococci; Deinococcales; Deinococcaceae; Deinococcus; Deinococcus gobiensis; Deinococcus gobiensis I-0;
Haliangium ochraceum DSM 14365	HochA01.ACY13241.1	D0LLM4	Hoch_0604	LHR-like	cellular organisms; Bacteria; Proteobacteria; delta/epsilon subdivisions; Deltaproteobacteria; Myxococcales; Nannocystineae; Kofleriaceae; Haliangium; Haliangium ochraceum; Haliangium ochraceum DSM 14365;
Chamaesiphon minutus PCC 6605	CminA01.AFY92265.1	K9UBT4	Cha6605_1029	LHR-like	cellular organisms; Bacteria; Terrabacteria group; Cyanobacteria/Melainabacteria group; Cyanobacteria; Synechococcales; Chamaesiphonaceae; Chamaesiphon; Chamaesiphon minutus; Chamaesiphon minutus PCC 6605;
Chamaesiphon minutus PCC 6605	CminA01.AFY92452.1	K9UBH5	Cha6605_1244	LHR-like	cellular organisms; Bacteria; Terrabacteria group; Cyanobacteria/Melainabacteria group; Cyanobacteria; Synechococcales; Chamaesiphonaceae; Chamaesiphon; Chamaesiphon minutus; Chamaesiphon minutus PCC 6605;
Vulgatibacter incomptus DSM 27710	VincA01.AKU90927.1	A0A0K1PBQ2	AKJ08_1314	LHR-like	cellular organisms; Bacteria; Proteobacteria; delta/epsilon subdivisions; Deltaproteobacteria; Myxococcales; Cystobacterineae; Vulgatibacteraceae; Vulgatibacter; Vulgatibacter incomptus;
Myxococcus macrosporus DSM 14697	MmacA01.ATB47179.1	A0A250JTG6	MYMAC_002787	LHR-like	cellular organisms; Bacteria; Proteobacteria; delta/epsilon subdivisions; Deltaproteobacteria; Myxococcales; Cystobacterineae; Myxococcaceae; Corallococcus; Corallococcus macrosporus; Myxococcus macrosporus DSM 14697;
Planctopirus limnophila DSM 3776	PlimA01.ADG68895.1	D5SSU4	Plim_3077	LHR-like	cellular organisms; Bacteria; PVC group; Planctomycetes; Planctomycetia; Planctomycetales; Planctomycetaceae; Planctopirus; Planctopirus limnophila; Planctopirus limnophila DSM 3776;
Corallococcus coralloides DSM 2259	CcorA01.LHR	H8MUB0	COCOR_05234	LHR-like	cellular organisms; Bacteria; Proteobacteria; delta/epsilon subdivisions; Deltaproteobacteria; Myxococcales; Cystobacterineae; Myxococcaceae; Corallococcus; Corallococcus coralloides; Corallococcus coralloides DSM 2259;
Haliangium ochraceum DSM 14365	HochA01.ACY13773.1	D0LS76	Hoch_1206	LHR-like	cellular organisms; Bacteria; Proteobacteria; delta/epsilon subdivisions; Deltaproteobacteria; Myxococcales; Nannocystineae; Kofleriaceae; Haliangium; Haliangium ochraceum; Haliangium ochraceum DSM 14365;
Sorangium cellulosum So ce 56	ScelA01.CAN97856.1	A9F615	sce7687	LHR-like	cellular organisms; Bacteria; Proteobacteria; delta/epsilon subdivisions; Deltaproteobacteria; Myxococcales; Sorangiineae; Polyangiaceae; Sorangium; Sorangium cellulosum; Sorangium cellulosum So ce56;
Singulisphaera acidiphila DSM 18658	SiacA01.AGA26312.1	L0DAN0	Sinac_1952	LHR-like	cellular organisms; Bacteria; PVC group; Planctomycetes; Planctomycetia; Isosphaerales; Isosphaeraceae; Singulisphaera; Singulisphaera acidiphila; Singulisphaera acidiphila DSM 18658;
Candidatus Accumulibacter phosphatis UW-1	AphoA01.ACV36635.1	C7RIR1	CAP2UW1_3372	LHR-like	cellular organisms; Bacteria; Proteobacteria; Betaproteobacteria; Betaproteobacteria incertae sedis; Candidatus Accumulibacter; Candidatus Accumulibacter phosphatis; Candidatus Accumulibacter phosphatis clade IIA str. UW-1;
Azoarcus sp. KH32C	AospA01.BAL23495.1	H0PYV8	AZKH_1166	LHR-like	cellular organisms; Bacteria; Proteobacteria; Betaproteobacteria; Rhodocyclales; Zoogloeaceae; Azoarcus; unclassified Azoarcus; Azoarcus sp. KH32C;
Candidatus Accumulibacter phosphatis UW-1	AphoA01.ACV34889.1	C7RTR3	CAP2UW1_1575	LHR-like	cellular organisms; Bacteria; Proteobacteria; Betaproteobacteria; Betaproteobacteria incertae sedis; Candidatus Accumulibacter; Candidatus Accumulibacter phosphatis; Candidatus Accumulibacter phosphatis clade IIA str. UW-1;
Hahella chejuensis KCTC 2396	HcheA01.ABC30210.1	Q2SGL4	HCH_03463	LHR-like	cellular organisms; Bacteria; Proteobacteria; Gammaproteobacteria; Oceanospirillales; Hahellaceae; Hahella; Hahella chejuensis; Hahella chejuensis KCTC 2396;
Planctomyces sp. SH-PL14	PcmyA01.RHLE_1	A0A142WZ12	VT03_18330	LHR-like	cellular organisms; Bacteria; PVC group; Planctomycetes; Planctomycetia; Planctomycetales; Planctomycetaceae; Planctomyces; unclassified Planctomyces; Planctomyces sp. SH-PL14;
Frankia casuarinae CcI3	FrspA01.ABD12315.1	Q2J8S7	Francci3_2957	LHR-like	cellular organisms; Bacteria; Terrabacteria group; Actinobacteria; Actinobacteria; Frankiales; Frankiaceae; Frankia; Frankia casuarinae;
Ilumatobacter coccineus YM16-304	IcocA01.BAN04398.1	M5A6F3	YM304_40840	LHR-like	cellular organisms; Bacteria; Terrabacteria group; Actinobacteria; Acidimicrobiia; Acidimicrobiales; Ilumatobacteraceae; Ilumatobacter; Ilumatobacter coccineus; Ilumatobacter coccineus YM16-304;
Microterricola viridarii ERGS5:02	MvirA01.AMB59183.1	A0A0X8E333	AWU67_10265	LHR-like	cellular organisms; Bacteria; Terrabacteria group; Actinobacteria; Actinobacteria; Micrococcales; Microbacteriaceae; Microterricola; Microterricola viridarii;
Rhodococcus fascians D188	RfasA01.RHPA	A0A165MDP4	A3L23_03425	LHR-like	cellular organisms; Bacteria; Terrabacteria group; Actinobacteria; Actinobacteria; Corynebacteriales; Nocardiaceae; Rhodococcus; Rhodococcus fascians; Rhodococcus fascians D188;
Cellulosimicrobium sp. TH-20	CespA01.ARK04284.1	A0A1W6DMX9	B8281_05545	LHR-like	cellular organisms; Bacteria; Terrabacteria group; Actinobacteria; Actinobacteria; Micrococcales; Promicromonosporaceae; Cellulosimicrobium; unclassified Cellulosimicrobium; Cellulosimicrobium sp. TH-20;
Saccharothrix espanaensis type strain: DSM 44229	SaesA01.CCH29146.1	K0JTD1	BN6_18260	LHR-like	cellular organisms; Bacteria; Terrabacteria group; Actinobacteria; Actinobacteria; Pseudonocardiales; Pseudonocardiaceae; Saccharothrix; Saccharothrix espanaensis; Saccharothrix espanaensis DSM 44229;
Mycobacterium gilvum PYR-GCK	MgilA01.ABP45676.1	A4TAT7	Mflv_3199	LHR-like	cellular organisms; Bacteria; Terrabacteria group; Actinobacteria; Actinobacteria; Corynebacteriales; Mycobacteriaceae; Mycolicibacterium; Mycolicibacterium gilvum; Mycolicibacterium gilvum PYR-GCK;
Microlunatus phosphovorus NM-1	MphoA01.BAK35872.1	F5XJH2	MLP_28580	LHR-like	cellular organisms; Bacteria; Terrabacteria group; Actinobacteria; Actinobacteria; Propionibacteriales; Propionibacteriaceae; Microlunatus; Microlunatus phosphovorus; Microlunatus phosphovorus NM-1;
Kocuria flava HO-9041	KoflA01.ALU39044.1	A0A0U2WRB9	AS188_03975	LHR-like	cellular organisms; Bacteria; Terrabacteria group; Actinobacteria; Actinobacteria; Micrococcales; Micrococcaceae; Kocuria; Kocuria flava;
Luteipulveratus mongoliensis MN07-A0370	LumoA01.AKU14871.1	A0A0K1JDT5	VV02_01645	LHR-like	cellular organisms; Bacteria; Terrabacteria group; Actinobacteria; Actinobacteria; Micrococcales; Dermacoccaceae; Luteipulveratus; Luteipulveratus mongoliensis;
Corynebacterium variabile DSM 44702	CvarA01.AEK37030.1	G0HEP4	CVAR_1678	LHR-like	cellular organisms; Bacteria; Terrabacteria group; Actinobacteria; Actinobacteria; Corynebacteriales; Corynebacteriaceae; Corynebacterium; Corynebacterium variabile; Corynebacterium variabile DSM 44702;
Streptomyces lincolnensis NRRL 2936	StliA01.ANS68511.1	A0A1B1MIT2	SLINC_6287	LHR-like	cellular organisms; Bacteria; Terrabacteria group; Actinobacteria; Actinobacteria; Streptomycetales; Streptomycetaceae; Streptomyces; Streptomyces lincolnensis;
Streptomyces glaucescens GLA.O	SglaA01.AIR98093.1	A0A089X4K6	SGLAU_10430	LHR-like	cellular organisms; Bacteria; Terrabacteria group; Actinobacteria; Actinobacteria; Streptomycetales; Streptomycetaceae; Streptomyces; Streptomyces glaucescens;
Streptomyces olivaceus KLBMP 5084	StolA01.AOW87752.1	A0A1D8SQV4	BC342_15720	LHR-like	cellular organisms; Bacteria; Terrabacteria group; Actinobacteria; Actinobacteria; Streptomycetales; Streptomycetaceae; Streptomyces; Streptomyces olivaceus;
Micromonospora aurantiaca ATCC 27029	MaurA01.ADL44860.1	D9TED1	Micau_1298	LHR-like	cellular organisms; Bacteria; Terrabacteria group; Actinobacteria; Actinobacteria; Micromonosporales; Micromonosporaceae; Micromonospora; Micromonospora aurantiaca; Micromonospora aurantiaca ATCC 27029;
Thermomonospora curvata DSM 43183	TcurA01.ACY97073.1	D1AAR3	Tcur_1494	LHR-like	cellular organisms; Bacteria; Terrabacteria group; Actinobacteria; Actinobacteria; Streptosporangiales; Thermomonosporaceae; Thermomonospora; Thermomonospora curvata; Thermomonospora curvata DSM 43183;
Streptosporangium roseum DSM 43021	SrosA01.ACZ90501.1	D2AT24	Sros_7838	LHR-like	cellular organisms; Bacteria; Terrabacteria group; Actinobacteria; Actinobacteria; Streptosporangiales; Streptosporangiaceae; Streptosporangium; Streptosporangium roseum; Streptosporangium roseum DSM 43021;
Thermobifida fusca YX	TfusA01.AAZ54750.1	Q47S17	Tfu_0712	LHR-like	cellular organisms; Bacteria; Terrabacteria group; Actinobacteria; Actinobacteria; Streptosporangiales; Nocardiopsaceae; Thermobifida; Thermobifida fusca; Thermobifida fusca YX;
Actinoalloteichus hymeniacidonis HPA177(T) (=DSM 45092(T))	AhymA01.AOS63684.1	A0A1D8BY08	TL08_14355	LHR-like	cellular organisms; Bacteria; Terrabacteria group; Actinobacteria; Actinobacteria; Pseudonocardiales; Pseudonocardiaceae; Actinoalloteichus; Actinoalloteichus hymeniacidonis;
Lactobacillus kefiranofaciens ZW3	LkefA01.AEG40883.1	F6CBT6	WANG_1188	LHR-like	cellular organisms; Bacteria; Terrabacteria group; Firmicutes; Bacilli; Lactobacillales; Lactobacillaceae; Lactobacillus; Lactobacillus kefiranofaciens; Lactobacillus kefiranofaciens ZW3;
Bifidobacterium thermophilum RBL67	BithA01.AGH41217.1	M4RRS2	D805_0950	LHR-like	cellular organisms; Bacteria; Terrabacteria group; Actinobacteria; Actinobacteria; Bifidobacteriales; Bifidobacteriaceae; Bifidobacterium; Bifidobacterium thermophilum; Bifidobacterium thermophilum RBL67;
Denitrobacterium detoxificans NPOH1	DdetA01.ANE23203.1	A0A172S012	AAY81_08925	LHR-like	cellular organisms; Bacteria; Terrabacteria group; Actinobacteria; Coriobacteriia; Eggerthellales; Eggerthellaceae; Denitrobacterium; Denitrobacterium detoxificans;
Treponema azotonutricium ZAS-9	TazoA01.AEF81438.1	F5YG54	TREAZ_0023	LHR-like	cellular organisms; Bacteria; Spirochaetes; Spirochaetia; Spirochaetales; Spirochaetaceae; Treponema; Treponema azotonutricium; Treponema azotonutricium ZAS-9;
Clostridium cellulovorans 743B	ClceA01.ADL50598.1	D9SSK1	Clocel_0828	LHR-like	cellular organisms; Bacteria; Terrabacteria group; Firmicutes; Clostridia; Clostridiales; Clostridiaceae; Clostridium; Clostridium cellulovorans; Clostridium cellulovorans 743B;
Syntrophobotulus glycolicus DSM 8271	SglyA01.ADY55222.1	F0T1V8	Sgly_0875	LHR-like	cellular organisms; Bacteria; Terrabacteria group; Firmicutes; Clostridia; Clostridiales; Peptococcaceae; Syntrophobotulus; Syntrophobotulus glycolicus; Syntrophobotulus glycolicus DSM 8271;
Paenibacillus riograndensis SBR5	PrioA01.CQR56084.1	A0A0E4HAW6	PRIO_3681	LHR-like	cellular organisms; Bacteria; Terrabacteria group; Firmicutes; Bacilli; Bacillales; Paenibacillaceae; Paenibacillus; Paenibacillus sonchi group; Paenibacillus riograndensis; Paenibacillus riograndensis SBR5;
Clostridium cellulolyticum H10; ATCC 35319	CcelA01.ACL75326.1	B8I966	Ccel_0964	LHR-like	cellular organisms; Bacteria; Terrabacteria group; Firmicutes; Clostridia; Clostridiales; Hungateiclostridiaceae; Ruminiclostridium; Ruminiclostridium cellulolyticum; Ruminiclostridium cellulolyticum H10;
Desulfitobacterium hafniense Y51	DhafA01.BAE82461.1	Q24ZT1	DSY0672	LHR-like	cellular organisms; Bacteria; Terrabacteria group; Firmicutes; Clostridia; Clostridiales; Peptococcaceae; Desulfitobacterium; Desulfitobacterium hafniense; Desulfitobacterium hafniense Y51;
Leptolyngbya boryana NIES-2135	LeboA01.BAY54410.1	A0A1Z4JCG6	NIES2135_12270	LHR-like	cellular organisms; Bacteria; Terrabacteria group; Cyanobacteria/Melainabacteria group; Cyanobacteria; Synechococcales; Leptolyngbyaceae; Leptolyngbya; Leptolyngbya boryana; Leptolyngbya boryana NIES-2135;
Microcoleus sp. PCC 7113	MicsA01.AFZ19808.1	K9WHY9	Mic7113_4106	LHR-like	cellular organisms; Bacteria; Terrabacteria group; Cyanobacteria/Melainabacteria group; Cyanobacteria; Oscillatoriophycideae; Oscillatoriales; Microcoleaceae; Microcoleus; unclassified Microcoleus; Microcoleus sp. PCC 7113;
Nostoc flagelliforme CCNUN1	NflaA01.AUB40719.1	A0A2K8SZ61	COO91_06742	LHR-like	cellular organisms; Bacteria; Terrabacteria group; Cyanobacteria/Melainabacteria group; Cyanobacteria; Nostocales; Nostocaceae; Nostoc; Nostoc flagelliforme; Nostoc flagelliforme CCNUN1;
Calothrix sp. PCC 6303	CalsA01.AFZ00515.1	K9UZV7	Cal6303_1466	LHR-like	cellular organisms; Bacteria; Terrabacteria group; Cyanobacteria/Melainabacteria group; Cyanobacteria; Nostocales; Calotrichaceae; Calothrix; Calothrix parietina; Calothrix sp. PCC 6303;
Tumebacillus algifaecis THMBR28	TalgA01.ASS74169.1	A0A223CXS2	CIG75_03640	LHR-like	cellular organisms; Bacteria; Terrabacteria group; Firmicutes; Bacilli; Bacillales; Alicyclobacillaceae; Tumebacillus; Tumebacillus algifaecis;
Aneurinibacillus soli CB4	AsolA01.CSHA_5	A0A0U4NK17	CB4_03254	LHR-like	cellular organisms; Bacteria; Terrabacteria group; Firmicutes; Bacilli; Bacillales; Paenibacillaceae; Aneurinibacillus group; Aneurinibacillus; Aneurinibacillus soli;
Thermoanaerobacterium thermosaccharolyticum DSM 571	ThthA01.ADL68484.1	D9TMJ6	Tthe_0950	LHR-like	cellular organisms; Bacteria; Terrabacteria group; Firmicutes; Clostridia; Thermoanaerobacterales; Thermoanaerobacterales Family III. Incertae Sedis; Thermoanaerobacterium; Thermoanaerobacterium thermosaccharolyticum; Thermoanaerobacterium thermosaccharolyticum DSM 571;
Natranaerobius thermophilus JW/NM-WN-LF	NtheA01.ACB85103.1	B2A401	Nther_1523	LHR-like	cellular organisms; Bacteria; Terrabacteria group; Firmicutes; Clostridia; Natranaerobiales; Natranaerobiaceae; Natranaerobius; Natranaerobius thermophilus; Natranaerobius thermophilus JW/NM-WN-LF;
Carnobacterium sp. 17-4	CarsA01.YPRA	F4BPN6	CAR_c21590	LHR-like	cellular organisms; Bacteria; Terrabacteria group; Firmicutes; Bacilli; Lactobacillales; Carnobacteriaceae; Carnobacterium; unclassified Carnobacterium; Carnobacterium sp. 17-4;
Anaerococcus prevotii DSM 20548	ApreA01.ACV29244.1	C7RDI1	Apre_1220	LHR-like	cellular organisms; Bacteria; Terrabacteria group; Firmicutes; Tissierellia; Tissierellales; Peptoniphilaceae; Anaerococcus; Anaerococcus prevotii; Anaerococcus prevotii DSM 20548;
Chitinophaga pinensis DSM 2588	CpinA01.ACU59563.1	C7PDI4	Cpin_2070	LHR-like	cellular organisms; Bacteria; FCB group; Bacteroidetes/Chlorobi group; Bacteroidetes; Chitinophagia; Chitinophagales; Chitinophagaceae; Chitinophaga; Chitinophaga pinensis; Chitinophaga pinensis DSM 2588;
Chitinophaga pinensis DSM 2588	CpinA01.ACU61629.1	C7PFC4	Cpin_4172	LHR-like	cellular organisms; Bacteria; FCB group; Bacteroidetes/Chlorobi group; Bacteroidetes; Chitinophagia; Chitinophagales; Chitinophagaceae; Chitinophaga; Chitinophaga pinensis; Chitinophaga pinensis DSM 2588;
Chlorobium phaeobacteroides DSM 266	CphaA01.ABL66225.1	A1BIJ8	Cpha266_2227	LHR-like	cellular organisms; Bacteria; FCB group; Bacteroidetes/Chlorobi group; Chlorobi; Chlorobia; Chlorobiales; Chlorobiaceae; Chlorobium/Pelodictyon group; Chlorobium; Chlorobium phaeobacteroides; Chlorobium phaeobacteroides DSM 266;
Chryseobacterium sp. StRB126	ChrsA01.BAP31608.1	A0A077KKH4	CHSO_2571	LHR-like	cellular organisms; Bacteria; FCB group; Bacteroidetes/Chlorobi group; Bacteroidetes; Flavobacteriia; Flavobacteriales; Weeksellaceae; Chryseobacterium group; Chryseobacterium; unclassified Chryseobacterium; Chryseobacterium sp. StRB126;
Chryseobacterium taklimakanense NCTC13490	CtakA01.RECQ_3	A0A239XW31	SAMEA4412677_02626	LHR-like	cellular organisms; Bacteria; FCB group; Bacteroidetes/Chlorobi group; Bacteroidetes; Flavobacteriia; Flavobacteriales; Weeksellaceae; Chryseobacterium group; Planobacterium; Chryseobacterium taklimakanense;
Planctopirus limnophila DSM 3776	PlimA01.ADG66913.1	D5STS8	Plim_1076	LHR-like	cellular organisms; Bacteria; PVC group; Planctomycetes; Planctomycetia; Planctomycetales; Planctomycetaceae; Planctopirus; Planctopirus limnophila; Planctopirus limnophila DSM 3776;
Actinosynnema pretiosum X47	AretA01.ATE55615.1	A0A290Z9F4	CNX65_21910	LHR-like	cellular organisms; Bacteria; Terrabacteria group; Actinobacteria; Actinobacteria; Pseudonocardiales; Pseudonocardiaceae; Actinosynnema; Actinosynnema pretiosum;
Amycolatopsis methanolica 239	AmmeA01.AIJ24005.1	A0A076MZB5	AMETH_3913	LHR-like	cellular organisms; Bacteria; Terrabacteria group; Actinobacteria; Actinobacteria; Pseudonocardiales; Pseudonocardiaceae; Amycolatopsis; Amycolatopsis methanolica; Amycolatopsis methanolica 239;
Acaryochloris marina MBIC11017	AcmaA01.ABW28853.1	B0C714	AM1_3868	LHR-like	cellular organisms; Bacteria; Terrabacteria group; Cyanobacteria/Melainabacteria group; Cyanobacteria; Synechococcales; Acaryochloridaceae; Acaryochloris; Acaryochloris marina; Acaryochloris marina MBIC11017;
Thermobifida fusca YX	TfusA01.AAZ54099.1	Q47TW5	Tfu_0061	LHR-like	cellular organisms; Bacteria; Terrabacteria group; Actinobacteria; Actinobacteria; Streptosporangiales; Nocardiopsaceae; Thermobifida; Thermobifida fusca; Thermobifida fusca YX;
Pelodictyon phaeoclathratiforme BU-1	PphaA01.ACF42526.1	B4SBA5	Ppha_0189	LHR-like	cellular organisms; Bacteria; FCB group; Bacteroidetes/Chlorobi group; Chlorobi; Chlorobia; Chlorobiales; Chlorobiaceae; Chlorobium/Pelodictyon group; Pelodictyon; Pelodictyon phaeoclathratiforme; Pelodictyon phaeoclathratiforme BU-1;
Rubrivivax gelatinosus IL144	RgelA01.BAL95135.1	I0HQ48	RGE_17940	LHR-like	cellular organisms; Bacteria; Proteobacteria; Betaproteobacteria; Burkholderiales; Burkholderiales genera incertae sedis; Rubrivivax; Rubrivivax gelatinosus; Rubrivivax gelatinosus IL144;
Paraburkholderia terrae DSM 17804	PateA01.AUT59432.1	A0A2I8EJ58	C2L65_07355	LHR-like	cellular organisms; Bacteria; Proteobacteria; Betaproteobacteria; Burkholderiales; Burkholderiaceae; Paraburkholderia; Paraburkholderia terrae;
Pseudomonas cerasi	PcerA01.CZT28600.1	A0A193SNJ0	PCPL58_2144	LHR-like	cellular organisms; Bacteria; Proteobacteria; Gammaproteobacteria; Pseudomonadales; Pseudomonadaceae; Pseudomonas; Pseudomonas cerasi;
Pseudomonas silesiensis A3	PsilA01.ANJ54845.1	A0A191YPM6	PMA3_06590	LHR-like	cellular organisms; Bacteria; Proteobacteria; Gammaproteobacteria; Pseudomonadales; Pseudomonadaceae; Pseudomonas; Pseudomonas silesiensis;
Pseudomonas mendocina ymp	PmenA01.ABP86178.1	A4XXW2	Pmen_3426	LHR-like	cellular organisms; Bacteria; Proteobacteria; Gammaproteobacteria; Pseudomonadales; Pseudomonadaceae; Pseudomonas; Pseudomonas aeruginosa group; Pseudomonas mendocina; Pseudomonas mendocina ymp;
Bradyrhizobium oligotrophicum S58	BoliA01.BAM93146.1	M4ZHM6	S58_71820	LHR-like	cellular organisms; Bacteria; Proteobacteria; Alphaproteobacteria; Rhizobiales; Bradyrhizobiaceae; Bradyrhizobium; Bradyrhizobium oligotrophicum; Bradyrhizobium oligotrophicum S58;
Methyloceanibacter caenitepidi Gela4	McaeA01.BAQ16568.1	A0A0A8K0R5	GL4_1110	LHR-like	cellular organisms; Bacteria; Proteobacteria; Alphaproteobacteria; Rhizobiales; Rhizobiales incertae sedis; Methyloceanibacter; Methyloceanibacter caenitepidi;
Magnetospira sp. QH-2	MagsA01.CCQ74220.1	W6KA26	MGMAQ_2340	LHR-like	cellular organisms; Bacteria; Proteobacteria; Alphaproteobacteria; Rhodospirillales; Rhodospirillaceae; Magnetospira; unclassified Magnetospira; Magnetospira sp. QH-2;
Starkeya novella DSM 506	SnovA01.ADH89239.1	D6ZZA3	Snov_1939	LHR-like	cellular organisms; Bacteria; Proteobacteria; Alphaproteobacteria; Rhizobiales; Xanthobacteraceae; Starkeya; Starkeya novella; Starkeya novella DSM 506;
Novosphingobium pentaromativorans US6-1	NpenA01.AIT78365.1		JI59_00220	LHR-like	cellular organisms; Bacteria; Proteobacteria; Alphaproteobacteria; Sphingomonadales; Sphingomonadaceae; Novosphingobium; Novosphingobium pentaromativorans; Novosphingobium pentaromativorans US6-1;
Parvularcula bermudensis HTCC2503	PberA01.ADM08199.1	E0TAZ0	PB2503_00592	LHR-like	cellular organisms; Bacteria; Proteobacteria; Alphaproteobacteria; Parvularculales; Parvularculaceae; Parvularcula; Parvularcula bermudensis; Parvularcula bermudensis HTCC2503;
Snodgrassella alvi wkB2	SalvA01.AHN27950.1	X2H676	SALWKB2_0568	LHR-like	cellular organisms; Bacteria; Proteobacteria; Betaproteobacteria; Neisseriales; Neisseriaceae; Snodgrassella; Snodgrassella alvi; Snodgrassella alvi wkB2;
Rahnella aquatilis HX2	RaquA01.AFE58120.1	H8NTS4	Q7S_09420	LHR-like	cellular organisms; Bacteria; Proteobacteria; Gammaproteobacteria; Enterobacterales; Yersiniaceae; Rahnella; Rahnella aquatilis; Rahnella aquatilis HX2;
Marinobacter salarius R9SW1	MsalA01.AHI32794.1	W5YV87	AU15_20950	LHR-like	cellular organisms; Bacteria; Proteobacteria; Gammaproteobacteria; Alteromonadales; Alteromonadaceae; Marinobacter; Marinobacter salarius;
Photobacterium profundum ss9	PproA01.CAG20009.1	Q6LRR7	PBPRA1598	LHR-like	cellular organisms; Bacteria; Proteobacteria; Gammaproteobacteria; Vibrionales; Vibrionaceae; Photobacterium; Photobacterium profundum;
Psychrobacter urativorans R10.10B	PuraA01.ALF58861.1	A0A0M4TTS6	AOC03_01355	LHR-like	cellular organisms; Bacteria; Proteobacteria; Gammaproteobacteria; Pseudomonadales; Moraxellaceae; Psychrobacter; Psychrobacter urativorans;
Alteromonas naphthalenivorans SN2	AlspA01.AEF04342.1	F5ZEF1	ambt_14120	LHR-like	cellular organisms; Bacteria; Proteobacteria; Gammaproteobacteria; Alteromonadales; Alteromonadaceae; Alteromonas; Alteromonas naphthalenivorans;
Aliivibrio wodanis	AwodA01.CED70942.1	A0A090IKW5	AWOD_I_0849	LHR-like	cellular organisms; Bacteria; Proteobacteria; Gammaproteobacteria; Vibrionales; Vibrionaceae; Aliivibrio; Aliivibrio wodanis;

## Sheet: representative
Redundant sequences >70% identity to representing sequence in tree
Organism	Representing sequence id	Uniprot Ac	Locus-tag	Orthologous Group	Lineage
Mycobacterium smegmatis MC2 155	XaxoA01.LHR1	A0QT91	MSMEG_1757	bLHR-HTH	cellular organisms; Bacteria; Terrabacteria group; Actinobacteria; Actinobacteria; Corynebacteriales; Mycobacteriaceae; Mycolicibacterium; Mycolicibacterium smegmatis; Mycolicibacterium smegmatis MC2 155;
Escherichia coli K-12	SboyA01.LHR	P30015	b1653	bLHR-HTH	cellular organisms; Bacteria; Proteobacteria; Gammaproteobacteria; Enterobacterales; Enterobacteriaceae; Escherichia; Escherichia coli; Escherichia coli K-12; Escherichia coli str. K-12 substr. MG1655;
Pseudomonas putida KT2440	PpoaA01.AGE24744.1	Q88NV1	PP_1103	bLHR	cellular organisms; Bacteria; Proteobacteria; Gammaproteobacteria; Pseudomonadales; Pseudomonadaceae; Pseudomonas; Pseudomonas putida group; Pseudomonas putida; Pseudomonas putida KT2440;
