# Supplementary material for: Phylogenetic Diversity of Lhr Proteins and Biochemical Activities of the Thermococcales aLhr2 DNA/RNA Helicase
Source: Preprints.org preprint supplement (doi:10.20944/preprints202103.0477.v1), 2021-03-18
Supplement: Supplementary file 4 [file tableS2C-sequence-identifiers-Sfth.xlsx]

## Sheet: archaeal and bacterial Sfth
Organism	Sequence identifier	Uniprot Ac	Locus-tag	Group	Lineage
Methanosphaera sp. BMS	MsphA01.AWX32537.1	A0A2Z4L8H2	AW729_05235	Sfth	cellular organisms; Archaea; Euryarchaeota; Methanomada group; Methanobacteria; Methanobacteriales; Methanobacteriaceae; Methanosphaera; Methanosphaera sp. BMS;
Natronomonas pharaonis Gabara	NphaA01.CAI49872.1	A0A1U7EXH1	NP_3562A	Sfth	cellular organisms; Archaea; Euryarchaeota; Stenosarchaea group; Halobacteria; Halobacteriales; Haloarculaceae; Natronomonas; Natronomonas pharaonis; Natronomonas pharaonis DSM 2160;
Halopiger xanaduensis SH-6	HxanA01.AEH37724.1	F8D5Z5	Halxa_3110	Sfth	cellular organisms; Archaea; Euryarchaeota; Stenosarchaea group; Halobacteria; Natrialbales; Natrialbaceae; Halopiger; Halopiger xanaduensis; Halopiger xanaduensis SH-6;
Methanocella paludicola SANAE	MepaA01.BAI60887.1	D1YWR5	MCP_0815	Sfth	cellular organisms; Archaea; Euryarchaeota; Stenosarchaea group; Methanomicrobia; Methanocellales; Methanocellaceae; Methanocella; Methanocella paludicola; Methanocella paludicola SANAE;
Methanoculleus bourgensis MS2T	MbouA01.CCJ35574.1	I7LLR1	BN140_0651	Sfth	cellular organisms; Archaea; Euryarchaeota; Stenosarchaea group; Methanomicrobia; Methanomicrobiales; Methanomicrobiaceae; Methanoculleus; Methanoculleus bourgensis; Methanoculleus bourgensis MS2;
Methanosarcina horonobensis HB-1	MhorA01.AKB79183.1	A0A0E3SHG4	MSHOH_2700	Sfth	cellular organisms; Archaea; Euryarchaeota; Stenosarchaea group; Methanomicrobia; Methanosarcinales; Methanosarcinaceae; Methanosarcina; Methanosarcina horonobensis; Methanosarcina horonobensis HB-1 = JCM 15518;
Pyrobaculum arsenaticum DSM 13514	ParsA01.ABP51077.1	A4WL10	Pars_1523	Sfth	cellular organisms; Archaea; TACK group; Crenarchaeota; Thermoprotei; Thermoproteales; Thermoproteaceae; Pyrobaculum; Pyrobaculum arsenaticum; Pyrobaculum arsenaticum DSM 13514;
Vulcanisaeta distributa DSM 14429	VdisA01.ADN51039.1	E1QU45	Vdis_1661	Sfth	cellular organisms; Archaea; TACK group; Crenarchaeota; Thermoprotei; Thermoproteales; Thermoproteaceae; Vulcanisaeta; Vulcanisaeta distributa; Vulcanisaeta distributa DSM 14429;
Candidatus Nitrosopumilus adriaticus NF5	NadrA01.AJW70217.1	A0A0D5C1C8	NADRNF5_0521	Sfth	cellular organisms; Archaea; TACK group; Thaumarchaeota; Nitrosopumilales; Nitrosopumilaceae; Nitrosopumilus; Candidatus Nitrosopumilus adriaticus;
Cellulophaga lytica DSM 7489	ClytA01.ADY30203.1	F0RGZ9	Celly_2386	Sfth	cellular organisms; Bacteria; FCB group; Bacteroidetes/Chlorobi group; Bacteroidetes; Flavobacteriia; Flavobacteriales; Flavobacteriaceae; Cellulophaga; Cellulophaga lytica; Cellulophaga lytica DSM 7489;
Novosphingobium sp. PP1Y	NovsA01.CCA92392.1	F6ILU0	PP1Y_AT15013	Sfth	cellular organisms; Bacteria; Proteobacteria; Alphaproteobacteria; Sphingomonadales; Sphingomonadaceae; Novosphingobium; Novosphingobium sp. PP1Y;
Escherichia coli SS17	EcoiA01.AIF96934.1		SS17_5452	Sfth	cellular organisms; Bacteria; Proteobacteria; Gammaproteobacteria; Enterobacterales; Enterobacteriaceae; Escherichia; Escherichia coli; Escherichia coli O157:H7; Escherichia coli O157:H7 str. SS17;
Escherichia coli SS17	EcoiA01.AIF96937.1		SS17_5455	Sfth	cellular organisms; Bacteria; Proteobacteria; Gammaproteobacteria; Enterobacterales; Enterobacteriaceae; Escherichia; Escherichia coli; Escherichia coli O157:H7; Escherichia coli O157:H7 str. SS17;
Kosakonia radicincitans DSM 16656	KoraA01.ARD62684.1	A0A1V0LJC2	Y71_23245	Sfth	cellular organisms; Bacteria; Proteobacteria; Gammaproteobacteria; Enterobacterales; Enterobacteriaceae; Kosakonia; Kosakonia radicincitans; Kosakonia radicincitans DSM 16656;
Treponema caldarium DSM 7334	ScalA01.AEJ19395.1	F8F1R1	Spica_1249	Sfth	cellular organisms; Bacteria; Spirochaetes; Spirochaetia; Spirochaetales; Spirochaetaceae; Treponema; Treponema caldarium; Treponema caldarium DSM 7334;
Mycobacterium kansasii ATCC 12478	MykaA01.AGZ52174.1	U5WSP8	MKAN_19175	Sfth	cellular organisms; Bacteria; Terrabacteria group; Actinobacteria; Actinobacteria; Corynebacteriales; Mycobacteriaceae; Mycobacterium; Mycobacterium kansasii; Mycobacterium kansasii ATCC 12478;
Nocardia seriolae EM150506	NserA01.APA97244.1	A0A1I9Z5M9	NS506_03191	Sfth	cellular organisms; Bacteria; Terrabacteria group; Actinobacteria; Actinobacteria; Corynebacteriales; Nocardiaceae; Nocardia; Nocardia seriolae;
Amycolatopsis mediterranei U32	AmedA01.ADJ50004.1	D8HIS7	AMED_8307	Sfth	cellular organisms; Bacteria; Terrabacteria group; Actinobacteria; Actinobacteria; Pseudonocardiales; Pseudonocardiaceae; Amycolatopsis; Amycolatopsis mediterranei; Amycolatopsis mediterranei U32;
Streptomyces lavendulae CCM 3239	SlavA01.ATZ23086.1	A0A2K8P8N8	SLAV_05905	Sfth	cellular organisms; Bacteria; Terrabacteria group; Actinobacteria; Actinobacteria; Streptomycetales; Streptomycetaceae; Streptomyces; Streptomyces lavendulae; Streptomyces lavendulae subsp. lavendulae;
Streptomyces pactum ACT12	SactA01.AQS69871.1	A0A1S6JDM4	B1H29_25985	Sfth	cellular organisms; Bacteria; Terrabacteria group; Actinobacteria; Actinobacteria; Streptomycetales; Streptomycetaceae; Streptomyces; Streptomyces pactum;
Streptomyces scabiei 87.22	SscaA01.CBG68748.1	C9ZD20	SCAB_16121	Sfth	cellular organisms; Bacteria; Terrabacteria group; Actinobacteria; Actinobacteria; Streptomycetales; Streptomycetaceae; Streptomyces; Streptomyces scabiei; Streptomyces scabiei 87.22;
Clostridium clariflavum DSM 19732	CclaA01.AEV68314.1	G8LSL0	Clocl_1700	Sfth	cellular organisms; Bacteria; Terrabacteria group; Firmicutes; Clostridia; Clostridiales; Hungateiclostridiaceae; Hungateiclostridium; Hungateiclostridium clariflavum; Hungateiclostridium clariflavum DSM 19732;
Desulfitobacterium hafniense Y51	DhafA01.BAE82463.1	Q24ZS9	DSY0674	Sfth	cellular organisms; Bacteria; Terrabacteria group; Firmicutes; Clostridia; Clostridiales; Peptococcaceae; Desulfitobacterium; Desulfitobacterium hafniense; Desulfitobacterium hafniense Y51;
Thermoanaerobacter sp. X513	ThesA01.ADN54301.1	E1SYI7	Thet_0664	Sfth	cellular organisms; Bacteria; Terrabacteria group; Firmicutes; Clostridia; Thermoanaerobacterales; Thermoanaerobacteraceae; Thermoanaerobacter; Thermoanaerobacter sp. X513;
