# Supplementary figures and images for: Phylogenetic Diversity of Lhr Proteins and Biochemical Activities of the Thermococcales aLhr2 DNA/RNA Helicase
Source: Preprints.org preprint supplement (doi:10.20944/preprints202103.0477.v1), 2021-03-18

Figure S4

A. *Tbar-aLhr2*

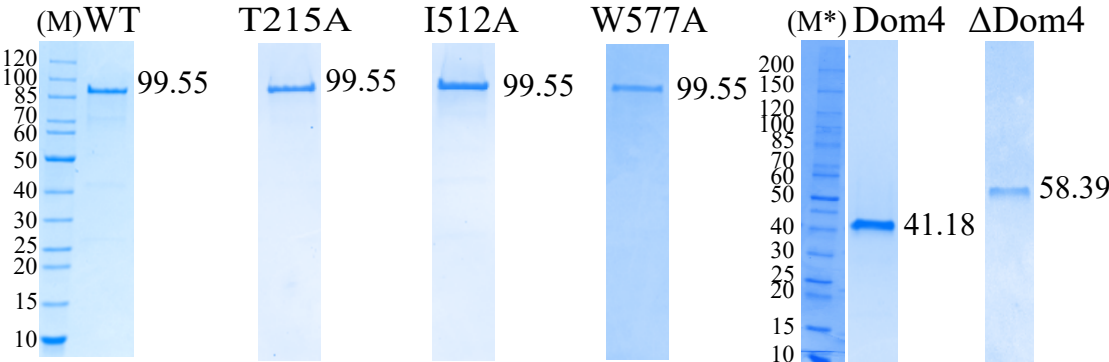

B.

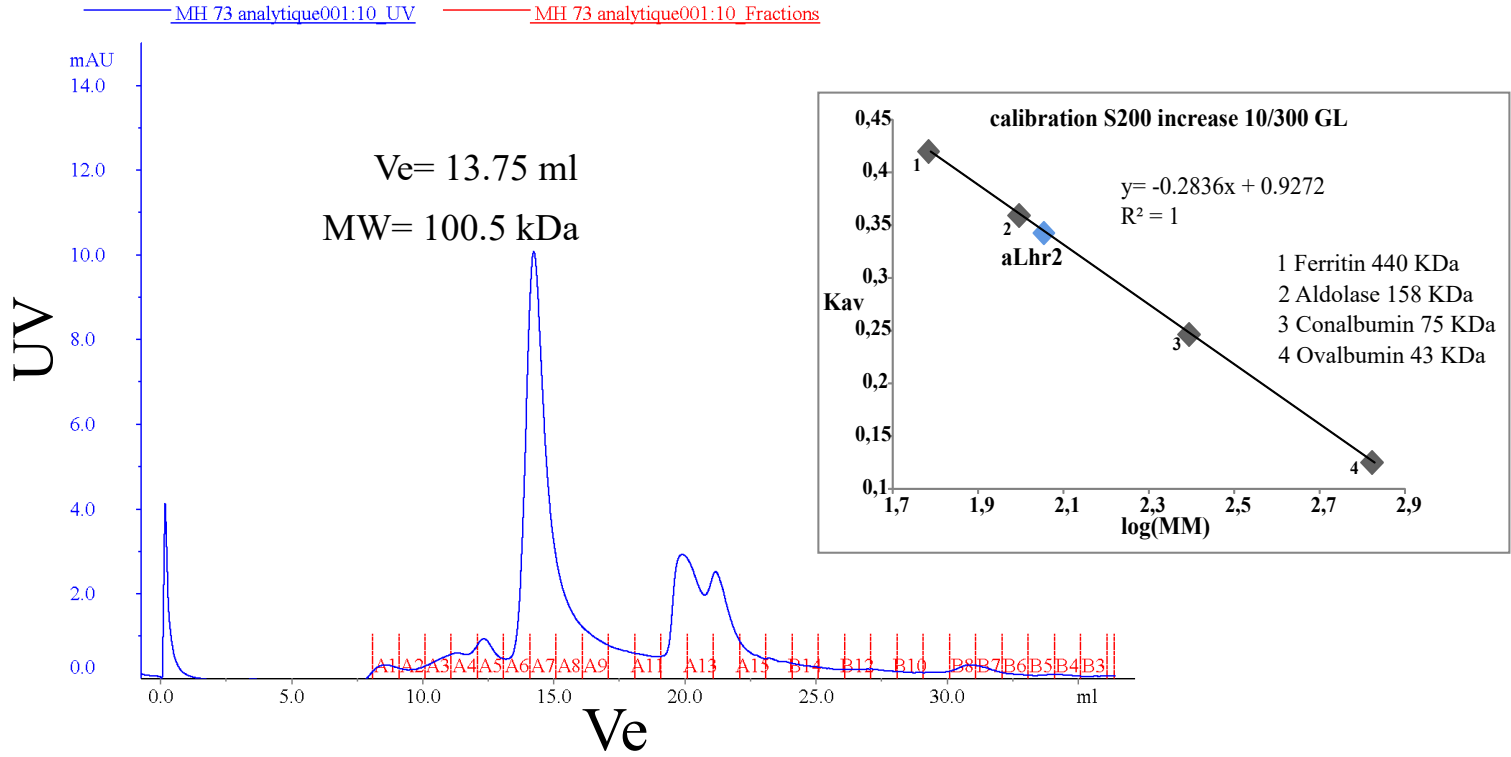

Supplement: Supplementary file 1 [file supplementary]
